26 **organoids derived from human embryonic stem cells capable of restoring plasma thyroid**  
27 **hormone to athyreotic mice as a proof of concept for future therapeutic development.**

28

29 Hypothyroidism is a very common disorder with a prevalence of 1% to 5% worldwide. It  
30 results from insufficient thyroid hormone (TH) production due to autoimmune damage to the  
31 thyroid gland, iodide excess or deficiency, external irradiation, genetic defects or other defects  
32 manifesting at birth (congenital hypothyroidism, CH) and surgical or radioactive thyroid  
33 ablation to treat hyperthyroidism or thyroid cancer<sup>1-3</sup>. Despite well-established TH  
34 replacement therapy, it is estimated that up to one-third of patients do not receive an adequate  
35 treatment<sup>4,5</sup> while a large proportion have impaired health-related quality of life, particularly  
36 psychological well-being<sup>6,7</sup>. In addition, studies have shown that children with CH can develop  
37 motor, cognitive, and social dysfunction even when diagnosed through newborn screening  
38 followed by early institution of TH replacement<sup>7,8</sup>. Indeed, constant exogenous supply of TH  
39 does not provide for changes in TH requirement associated with growth, puberty, pregnancy  
40 and stress, leaving room for new therapeutic approaches, such as regenerative medicine, that  
41 would accommodate the variation in TH demand.

42 In recent years, significant progress has been made in the development and application of  
43 human cell-based models for the study of human biology and disease modeling. Human  
44 embryonic stem cell (ESC)-based protocols have been developed and led to the generation of  
45 several types of human organoids that include brain, intestine, stomach, liver, kidney, lung,  
46 endometrium, prostate, pancreas, and retina<sup>8,9</sup>. With regard to the thyroid, murine ESC-derived  
47 organoids have been shown to recapitulate *in vitro* the developmental stages of the thyroid  
48 gland with the ability to produce TH *in vitro* and *in vivo* after transplantation to mice with  
49 ablated thyroid glands<sup>11-15</sup>.

50 In contrast, human thyroid cells so far generated from stem cells have not shown full maturation  
51 *in vitro* and ability to compensate for low TH levels when transplanted into animals devoid of  
52 thyroid tissue<sup>10-14</sup>. These difficulties in producing functional human thyroid follicles capable  
53 of restoring thyroid function *in vivo* have been partially overcome by using organoids generated  
54 from suspensions of adult human thyroid cells, but with some limitations. Hence, Coppes et al.  
55<sup>15</sup> generated thyrospheres from human thyroid glands, but 26 weeks are required to detect  
56 human thyroid tissue when these organoids are transplanted into hypothyroid mice, and plasma  
57 levels of T4 did not increase significantly<sup>15</sup>.

58 Given the lack of a functional *in vitro* thyroid model to further explore various aspects related  
59 to thyroid development, maturation and disease and to provide an alternative to imperfect drug  
60 treatment to restore thyroid function in patients, there is an urgent need to define an optimized  
61 strategy to generate TH producing human follicles from stem cells. We used forward  
62 programming by transient overexpression of *NKX2-1* and *PAX8* transcription factors (TFs) and  
63 manipulation of signaling pathways in combination with stepwise transcriptomic  
64 characterization, to generate a functional human thyroid from pluripotent stem cells that  
65 recapitulates thyroid function *in vitro* and *in vivo*.

66

## 67 ***In vitro* differentiation of human thyroid cells**

68 *hESC line generation and characterization:* in recent years, mouse ESC-derived *in vitro*  
69 thyroid models have provided understanding of mechanisms involved in thyroid development  
70 and maturation<sup>10,16-19</sup>. However, replication of the protocols using hESC/iPSC was insufficient  
71 to generate a functional human thyroid *in vitro*<sup>14,16-18</sup>. Since we have previously shown that  
72 forward programming<sup>20-23</sup> by transient overexpression of the transcription factors, *Nkx2-1* and  
73 *Pax8*<sup>24</sup> leads to high efficiency of thyroid differentiation and functional follicle formation from  
74 mouse ESC<sup>16</sup>, we used a similar approach to generate a recombinant human ESC line. First,

75 we took advantage of a previously generated NKX2-1<sup>WT/GFP</sup> knock-in hESC line<sup>25</sup> (Extended  
76 data Fig. 1a) to track thyroid differentiation and cell organization using the NKX2-1<sup>GFP</sup>  
77 reporter. Furthermore, the hESC-NKX2-1<sup>WT/GFP</sup> line was modified to allow transient  
78 expression of *NKX2-1* and *PAX8*, by adding doxycycline (Dox; 1 mg/ml; Extended data Fig.  
79 1b) to the culture medium (Fig. 1a). The resulting hESCs, had normal karyotype and ability to  
80 spontaneously differentiate into cells from the three germ layers (Extended data Fig. 1c-d,  
81 respectively).

82 Induction of thyroid status: The modified hESCs were first grown for 2 days in hanging drops  
83 to allow the formation of embryoid bodies (EBs) (Fig. 1a). The generated EBs were then  
84 cultured in matrigel drops and endoderm was induced by adding Activin A for 3 days. This  
85 treatment resulted in increased mRNA levels of the endoderm markers *SOX17* and *FOXA2*  
86 (Extended data Fig. 1e) and simultaneously improved the percentage of FOXA2 + cells,  
87 particularly in the inner compartment of EBs (Extended data Fig. 1f). After induction of the  
88 endoderm, Dox treatment promoted the overexpression of *NKX2-1* and *PAX8*. After 4 days,  
89 expression of NKX2-1 and PAX8 was detected by immunofluorescence in a large proportion  
90 of Dox-treated cells but not in the absence of Dox (Extended data Fig. 1g). Furthermore, qPCR  
91 analysis showed that not only were exogenous *NKX2-1* and *PAX8* gene expression levels  
92 significantly upregulated, but endogenous *NKX2-1*, *PAX8*, *FOXE1*, *TG*, and *TSHR* mRNA  
93 levels were also increased as early as day 9 (Extended data Fig. 1h). To determine whether  
94 forced overexpression of thyroid TFs leads to autonomous activation of endogenous cell  
95 programming in thyroid fate, Dox treatment was interrupted and cells were incubated in basal  
96 differentiation medium for 7 days (from day 9 to day 16). qPCR analysis revealed that  
97 exogenous *PAX8* expression at day 9 was similar to endogenous *PAX8* expression, but the  
98 levels of exogenous TFs decreased over time and reached control levels (+AA -Dox) from day  
99 12. In contrast, endogenous *PAX8* levels increased dramatically and reached a plateau from

100 day 14 (Extended data Fig. 1i). These results suggest that Dox induction of TFs the endogenous  
101 transcriptional machinery is activated, initiating the thyroid differentiation program.

102 Thyroid cell population expansion and early differentiation were promoted by incubation with  
103 8-br-cAMP for 2 weeks (from day 16 to day 30). Flow cytometry analysis confirmed growth  
104 of the thyroid population resulting in approximately 25% of total cells expressing NKX2-1<sup>GFP</sup>  
105 at day 30 (Fig. 1b), reflecting the increase in proliferation as around 90% of NKX2-1<sup>GFP+</sup> cells  
106 continuously expressed KI67 during the treatment period (Extended data Fig. 2a). Accordingly,  
107 transcriptomics analysis performed in NKX2-1<sup>GFP</sup> cells showed high levels of various  
108 proliferation markers (Extended data Fig. 2b). In parallel, an increase in expression of early  
109 thyroid markers was also observed over time (+AA +Dox +cAMP), confirming the role of  
110 cAMP in cell differentiation (Fig. 1c). This was accompanied by a steady expression of key  
111 genes such as *NKX2-1*, *TG*, and *TSHR* from day 23 (Extended data Fig. 2c). However, key  
112 maturation markers, such as *NIS*, *TPO* and *DUOX* family, were not significantly induced by  
113 cAMP, suggesting that it is not sufficient to promote thyroid maturation and function. By  
114 tracking NKX2-1<sup>GFP+</sup> cells we observed at day 28, that thyroid cells start to form follicle-like  
115 structures and immunostaining shows marked expression of *TG* and *PAX8*. Though, the cells  
116 were not organized in single-layered follicles, but a luminal compartment was observed  
117 (Extended data Fig. 2d), suggesting that the process of folliculogenesis is not yet complete at  
118 this stage.

119 Thyroid maturation and function: since cAMP treatment was not able to fully promote thyroid  
120 maturation despite significant expression of *TSHR*, we explored additional ways to promote  
121 thyroid differentiation. As the TSHR controls more than the Gs regulatory cascade<sup>26</sup>, we first  
122 replaced cAMP with hrTSH from day 30. Second, we added dexamethasone (from day 30) and  
123 the TGF $\beta$  inhibitor SB431542 (from day 37), based on transcriptomic data showing substantial  
124 levels of TGF $\beta$  pathway markers (Extended data Fig. 2f) among NKX2-1 cells, and the known

125 inhibition of thyroid differentiation by inflammation and TGF $\beta$  pathway stimulation<sup>27–31</sup>.  
126 Together, these alterations of the protocol (Fig. 1a) resulted in significant improvement in the  
127 expression of key thyroid maturation markers, including *TSHR*, *TG*, *NIS/SLC5A5*, *TPO*, *DIO2*,  
128 and the *DUOX* family (Figs. 1c and Extended data Fig. 2e), while mRNA levels of TGF $\beta$   
129 pathway effectors were reduced, particularly receptors (Extended data Fig. 2f). Subsequently,  
130 PAX8 and ZO -1 co-staining revealed monolayer-organized follicles with a well delimited  
131 lumen (Extended data Fig. 2g). On the other hand, the proportion of NKX2-1+ cells was  
132 maintained over time, whereas NKX2-1/KI67+ cells clearly decreased at day 47, compared to  
133 the early time points (Fig. 1b and Extended data Fig. 2a, respectively). Of note, our human  
134 hESC-derived protocol for thyroid generation follows the sequential events observed *in vivo*,  
135 as in human, thyroid development takes approximately 40 days from specification to  
136 folliculogenesis<sup>32,33</sup>, a similar developmental time is required in our *in vitro* model.  
137 Considering that we artificially induce thyroid progenitor cells formation by forcing the  
138 expression of *NKX2-1* and *PAX8*, the expression of maturation genes follows the physiological  
139 sequence, with *TG* and *TSHR* being the first detected genes, followed by *TPO* and *NIS/SLC5A5*  
140<sup>32,33</sup>. A similar effect trend was observed in thyroid population expansion, organization and  
141 follicle formation. However, even though the TH machinery seems to be complete, we could  
142 not detect TH-producing follicles at day 45.

143

#### 144 **Single cell characterization of human thyroid organoids.**

145 To better characterize the resulting cell composition of our hESC-derived thyroid model,  
146 scRNA-seq analyzes were performed at day 45. Since the efficiency of the present protocol is  
147 approximately 25%, we enriched the proportion of NKX2-1<sup>GFP+</sup> cells to 60%, the remaining  
148 sorted cells belonging to the GFP- population. A total of approximately 6,000 cells were used  
149 for scRNA-seq library preparation using the droplet-based assay from 10X Genomics. After

150 quality control (see extended data methods), we obtained 1874 cells that met all the criteria.  
151 Among those cells, we identified 7 clusters (Fig. 1d-e), including a cluster of thyroid follicular  
152 cells with 1176 cells showing expression of genes involved in development and function,  
153 including *NKX2-1*, *PAX8*, *FOXE1*, *HHEX*, *TG*, *TSHR*, and *TPO* (Fig. 1e-f). Of note, we  
154 identified three sub-clusters among the thyroid cells: Thyroid "progenitors" (477 cells)  
155 expressing mainly the thyroid TFs; immature thyrocytes (365 cells) expressing also *TG* and  
156 *TSHR*; and mature thyrocytes (334 cells) showing a canonical thyroid signature with a higher  
157 proportion of *TPO*-expressing cells (Fig. 1e-f and Extended data Fig. 3a). Furthermore,  
158 pseudotime analysis reveals a branch of differentiation originating from thyroid progenitors  
159 and moving toward immature and progressive mature thyrocytes (Fig. 1g). This transition was  
160 used to generate the trend of gene expression for the different thyroid markers along the  
161 trajectory (Fig. 1h), which follows the expected dynamics, with TFs appearing first, followed  
162 by *TSHR*, *TG*, and *TPO* expression (Fig. 1e).

163 The identity and molecular signature of the remaining cells was characterized, and we  
164 identified four non-thyroidal clusters: fibroblasts (146 cells) expressing *DCN*, *COL1A2*, and  
165 *PPRX1*; cardiovascular cells (182 cells) enriched in *ACTA2* and *TNNT2* markers; airway cells  
166 (203 cells) expressing *KRT5* and *TP63* and endoderm-epithelial cells (167) expressing *FOXA1*,  
167 *FOXA2*, and *ADAM28* (Fig. 1d-e and Extended data Fig. 3b). Even if *NKX2-1* also plays a  
168 critical role in lung and forebrain development<sup>34</sup>, our protocol predominantly generates thyroid  
169 cells, since more than 75% of *NKX2-1*+ cells co-express *PAX8* and/or other thyroid markers.

170 *Connectome*: To predict possible crosstalk between thyroid cells and the other cells present in  
171 the organoids, we used CellPhone-DB, to access the ligand-receptor interaction pairs identified  
172 between thyroid clusters and other cell types. Interestingly, we found significant cell-cell  
173 interactions between thyroid cells with mainly mesodermal cells associated with several  
174 signaling pathways described as involved in thyroid development and physiology (Extended

175 data Fig. 3c). Previous studies performed *in vivo* and using stem cell-derived organoids have  
176 described the critical role of BMP and FGF signaling pathways in regulating thyroid  
177 specification, as well as how WNT signaling can influence thyroid development and determine  
178 lineage choice toward lung specification<sup>10,17,19,35,36</sup>. Here, we observed that in our multicellular  
179 organoid model, the presence of mesoderm-derived cells could be beneficial for thyroid  
180 development without supplementation of factors, as we observed that fibroblasts and  
181 cardiovascular cells are an important source of *BMP2*, *BMP4*, and *FGF2* ligands, whereas  
182 thyroid cells express the specific receptors (Extended data Fig. 3c-d). In addition, insulin-like  
183 growth factor (IGF-I) is known to support normal thyroid size and function, in part by  
184 enhancing TSH sensitivity<sup>37</sup>. In addition to BMP and FGF, mesodermal, airway and endoderm  
185 epithelial cells also provide significant amounts of *IGF-1* and *IGF-2*, while progenitors and  
186 immature thyrocytes express *IGF1R* and mature thyrocytes mainly express *IGF2R*. On the  
187 other hand, we also observed that fibroblasts and cardiovascular cells express significant  
188 amounts of *WNT2*, *WNT5A*, *TGFb1*, and *TGFb2*, whereas thyroid cells express their respective  
189 receptors (Extended data Fig. 3c-d). As described previously, in our model, inhibition of TGFβ  
190 signaling leads to enhanced thyroid maturation, and this effect may also be related to repression  
191 of such signals from mesodermal-like cells.

192

### 193 **Promotion of thyroid hormone synthesis**

194 Despite the cell differentiation and follicular organization at day 45, single-cell RNA profiling  
195 revealed that a substantial proportion of the thyrocyte population was not fully mature, which  
196 may explain the lack of TH detection at this stage. To promote functionality, we kept the  
197 thyroid cells in culture for a longer period of time, mimicking the *in vivo* thyroid maturation.

198 *Complete in vitro human thyroid maturation and thyroid hormone synthesis*: Human thyroid  
199 development begins around day 20 post fertilization, while completed organogenesis and TH



200 production can be detected at day 70<sup>32,33</sup>. Based on the time required for thyroid full maturation  
201 and TH synthesis *in vivo*, we kept the organoids growth for two additional weeks using the  
202 same conditioned medium (Fig. 1a). Immunostaining revealed a large proportion of well-  
203 organized follicles expressing NKX2-1, E-CADHERIN (Fig. 2a) and TG which accumulated  
204 mainly in the lumen (Fig. 2b). In addition, marked TPO staining was observed in most follicular  
205 structures, with accumulation at the apical membrane indicating an enhancement of maturation  
206 (Fig. 2c). Finally, prolongation of the differentiation protocol resulted in TH synthesis, as  
207 evidenced by the detection of T4 in the lumen of hESC-derived thyroid follicles (Fig. 2d).

208 Assessment of *in vivo* functionality of hESC-derived thyroid follicles: To evaluate the *in vivo*  
209 functionality of hESC-derived thyroid follicles, the recovery of TH was measured in NOD-  
210 SCID mice whose thyroid gland was ablated with radioactive iodine (RAI) following low-  
211 iodine diet to enhance thyroidal RAI uptake. Thyroid ablation was confirmed after 4 weeks by  
212 SPEC-CT imaging with <sup>123</sup>I. Organoids were harvested and filtered at day 45 to remove most  
213 isolated cells and transplanted under the kidney capsule of mice with intact and ablated thyroid  
214 glands (Fig. 3a). Due to technical problems caused by the radiosensitivity of immunodeficient  
215 mice<sup>38,39</sup>, 60% of the irradiated animals died during the experimental period. At the end of the  
216 experiment, 6 non-transplanted and 4 transplanted mice had survived and could be compared  
217 with 6 untreated animals that served as controls.

218 Histological evaluation of the renal region five weeks after transplantation showed successful  
219 implantation of the transplanted organoids in the host niche (Fig. 3b). HE staining showed  
220 numerous follicles organized in a manner characteristic of thyroid tissue (Fig. 3b and Extended  
221 data Fig. 4a). The presence of blood vessels in close proximity to the thyroid follicles is  
222 essential for the TH release and transport to target tissues. Indeed, blood vessels and stromal  
223 cells could be observed in the vicinity of the thyroid follicles (Extended data Fig. 4a-b).  
224 Immunostaining for the platelet-derived endothelial cell adhesion molecule CD31 revealed a

225 dense network of small blood vessels surrounding the thyroid follicles, demonstrating the  
226 formation of classic angio-follicular units (Extended data Fig. 4b). The absence of staining  
227 overlap between CD31 and Human Nuclear Antigen (HNA) provided unequivocal evidence  
228 that the vessels originated from host cells (Extended data Fig. 4b). On the other hand, the  
229 stromal cells were derived from the grafted cells since they co-expressed HNA and  $\alpha$ -SMA  
230 (Extended data Fig. 4c). HE staining showed that the derived follicular epithelium included  
231 both active follicles, which appeared cuboidal to low columnar, and inactive ones, in which the  
232 cells were squamous (Fig. 4d). Further immunohistochemical analysis supported the formation  
233 of functional thyroid follicles (NKX2-1+) at the graft site, including cell polarization labeled  
234 by E-Cadherin, TG cytosolic expression and deposition in the luminal compartment, and the  
235 appearance of TPO in the cytoplasm and mainly at the apical membrane (Fig. 3c). The  
236 transplanted tissue had a similar thyroid gene expression signature compared to human thyroid  
237 tissue (Extended data Fig. 4e).

238 SPECT-CT imaging was used to track the human thyroid graft performance, by the ability of  
239 NIS-dependent iodide uptake by thyroid tissue <sup>40</sup>. Images were acquired four weeks after  
240 transplantation and showed a strong uptake signal in the neck (where the thyroid gland is  
241 located) of non-ablated mice. In thyroid gland ablated transplanted mice, <sup>123</sup>I uptake was  
242 markedly decreased in the neck, but a very strong signal was detectable at the site of  
243 transplantation, near the kidney (Fig. 4a). <sup>123</sup>I quantification in SPECT images expressed as  
244 percent injected dose (% ID <sup>40</sup>) confirmed the uptake capacity of the transplanted tissue, with  
245 a % ID slightly lower compared to the thyroid tissue, while very low uptake values were  
246 detected in the neck of the hypothyroid non-transplanted mice (1.66 (0.96-2.14); 2.40 (1.72-  
247 4.91) and 0.010 (0.0023-0.032) % ID, respectively;  $p < 0.01$ ; Fig. 4a-b).

248 More importantly, transplanted animals presented a marked increase in plasma T4 levels (1.26  
249 (0.86-2.49)  $\mu$ g/dl) compared to barely detectable plasma T4 levels in non-transplanted animals

250 (0.11 (0.06-0.23)  $\mu\text{g}/\text{dl}$ ), however still lower than controls non-irradiated (3.63 (3.35-3.80)  
251 (Fig. 4c). Evidence of functionality of the transplanted tissue is also provided by  
252 immunostaining for T4, which shows numerous active follicles with strong T4 signal in the  
253 luminal compartment (Fig. 4d). Considering the challenges of inducing thyroid ablation and  
254 transplanting human cells in immunodeficient mice, which are highly sensitive to radiations  
255 <sup>38,39</sup>, here we present a proof of concept trial showing that human functional thyroid tissue  
256 generated from pluripotent stem cells can be grafted and keep the functionality *in vivo*,  
257 producing THs and increasing T4 levels in hypothyroid animals.

258

## 259 **Conclusions and perspectives**

260 The generation of functional human thyroid follicles *in vitro* has proven to be extremely  
261 challenging, compared to mouse-derived equivalents. Although the generation of thyrocytes or  
262 thyroid follicles from human stem cells has been reported <sup>10-14</sup>, the present study is the first to  
263 demonstrate hESC-derived thyroid follicles that produce TH *in vitro* and *in vivo* after  
264 transplantation into thyroid gland ablated mice. Our model of human thyroid organoids that  
265 function upon transplantation provides valuable source of knowledge to improve our  
266 understanding of gene expression dynamics and mechanisms involved in thyroid  
267 differentiation and maturation. It could be used as a new diagnostic tool to study of the  
268 mechanisms leading to congenital hypothyroidism. Moreover, this model, although still in need  
269 of improvement, provides a proof of concept that generating autologous human thyroid tissue  
270 to maintain TH is within reach.

271

## 272 **METHODS SUMMARY**

273

274 The human NKX2-1<sup>WT/GFP</sup> ESC line <sup>25</sup> was genetically engineered to integrate the sequences  
275 of *NKX2-1* and *PAX8* genes using lentivirus infection produced with the TRE/rtTA\_NKX2-1-  
276 PAX8 vector (Extended data Fig. 1b). The modified hESC were cultured in embryoid bodies  
277 (EBs) using the hanging drop method <sup>20</sup>, embedded in growth factor-reduced Matrigel, and  
278 cultured in 12-well plates. Subsequent exposure to Activin A (AA), Doxycycline (Dox),  
279 cAMP, rhTSH, dexamethasone, and SB431542 was performed as described in Fig. 1a. During  
280 *in vitro* differentiation, organoids were subjected to extensive transcriptomic characterization  
281 by qRT-PCR, bulk RNAseq, and single-cell RNAseq, while morphological changes were  
282 assessed by live imaging and immunofluorescence. NKX2-1<sup>GFP+</sup> cell population expansion and  
283 proliferation were quantitatively measured by flow cytometry. *In vivo* studies were performed  
284 using NOD-SCID mice, who's thyroid glands were ablated as previously described <sup>16,41</sup>. For  
285 the transplantation studies, cultures were digested with a collagenase/dispase enzyme solution  
286 for 45 days and the enriched ESC-derived thyroid follicular population was transplanted under  
287 the kidney capsule. SPECT-CT images were acquired 4 weeks after transplantation, while T4  
288 plasma levels and histological analyzes were performed 5 weeks after transplantation.

289

## 290 **References**

- 291 1. Vanderpump, M. P. J. The epidemiology of thyroid disease. *British Medical Bulletin* **99**,  
292 39–51 (2011).
- 293 2. Garmendia Madariaga, A., Santos Palacios, S., Guillén-Grima, F. & Galofré, J. C. The  
294 Incidence and Prevalence of Thyroid Dysfunction in Europe: A Meta-Analysis. *The*  
295 *Journal of Clinical Endocrinology & Metabolism* **99**, 923–931 (2014).
- 296 3. Taylor, P. N. *et al.* Global epidemiology of hyperthyroidism and hypothyroidism.  
297 *Nature Reviews Endocrinology* vol. 14 301–316 (2018).

- 298 4. Dew, R. *et al.* Clinical, behavioural and pharmacogenomic factors influencing the  
299 response to levothyroxine therapy in patients with primary hypothyroidism-protocol for  
300 a systematic review. *Systematic reviews* **6**, 60 (2017).
- 301 5. Kraut, E. & Farahani, P. A Systematic Review of Clinical Practice Guidelines’  
302 Recommendations on Levothyroxine Therapy Alone versus Combination Therapy (LT4  
303 plus LT3) for Hypothyroidism. *Clinical & Investigative Medicine* **38**, (2015).
- 304 6. Watt, T. *et al.* The thyroid-related quality of life measure ThyPRO has good  
305 responsiveness and ability to detect relevant treatment effects. *Journal of Clinical*  
306 *Endocrinology and Metabolism* **99**, 3708–3717 (2014).
- 307 7. Saravanan, P. *et al.* Psychological well-being in patients on “adequate” doses of L-  
308 thyroxine: results of a large, controlled community-based questionnaire study. *Clinical*  
309 *Endocrinology* vol. 57 (2002).
- 310 8. Clevers, H. Modeling Development and Disease with Organoids. *Cell* vol. 165 1586–  
311 1597 (2016).
- 312 9. Kim, J., Koo, B. K. & Knoblich, J. A. Human organoids: model systems for human  
313 biology and medicine. *Nature Reviews Molecular Cell Biology* vol. 21 571–584 (2020).
- 314 10. Kurmann, A. A. *et al.* Regeneration of Thyroid Function by Transplantation of  
315 Differentiated Pluripotent Stem Cells. *Cell Stem Cell* **17**, 527–542 (2015).
- 316 11. Ma, R., Latif, R. & Davies, T. F. Human embryonic stem cells form functional thyroid  
317 follicles. *Thyroid: official journal of the American Thyroid Association* **25**, 455–461  
318 (2015).
- 319 12. Ma, R., Morshed, S. A., Latif, R. & Davies, T. F. TAZ Induction Directs Differentiation  
320 of Thyroid Follicular Cells from Human Embryonic Stem Cells. *Thyroid: official*  
321 *journal of the American Thyroid Association* **27**, 292–299 (2017).

- 322 13. Serra, M. *et al.* Pluripotent stem cell differentiation reveals distinct developmental  
323 pathways regulating Lung-Versus Thyroid-Lineage specification. *Development*  
324 (*Cambridge*) **144**, 3879–3893 (2017).
- 325 14. Ma, R., Shi, R., Morshed, S. A., Latif, R. & Davies, T. F. Derivation and 97%  
326 Purification of Human Thyroid Cells From Dermal Fibroblasts. *Frontiers in*  
327 *endocrinology* **11**, 446 (2020).
- 328 15. Ogundipe, V. M. L. *et al.* Generation and Differentiation of Adult Tissue-Derived  
329 Human Thyroid Organoids. *Stem Cell Reports* **16**, 913–925 (2021).
- 330 16. Antonica, F. *et al.* Generation of functional thyroid from embryonic stem cells. *Nature*  
331 **491**, 66–71 (2012).
- 332 17. Longmire, T. A. *et al.* Efficient derivation of purified lung and thyroid progenitors from  
333 embryonic stem cells. *Cell Stem Cell* **10**, 398–411 (2012).
- 334 18. Ma, R., Latif, R. & Davies, T. F. Thyroid follicle formation and thyroglobulin expression  
335 in multipotent endodermal stem cells. *Thyroid* **23**, 385–391 (2013).
- 336 19. Dame, K. *et al.* Thyroid Progenitors Are Robustly Derived from Embryonic Stem Cells  
337 through Transient, Developmental Stage-Specific Overexpression of Nkx2-1. *Stem Cell*  
338 *Reports* **8**, 216–225 (2017).
- 339 20. Bondue, A. *et al.* Mesp1 Acts as a Master Regulator of Multipotent Cardiovascular  
340 Progenitor Specification. *Cell Stem Cell* **3**, 69–84 (2008).
- 341 21. Mazzone, E. O. *et al.* Synergistic binding of transcription factors to cell-specific  
342 enhancers programs motor neuron identity. *Nature neuroscience* **16**, 1219–1227 (2013).
- 343 22. Moreau, T. *et al.* Large-scale production of megakaryocytes from human pluripotent  
344 stem cells by chemically defined forward programming. *Nature communications* **7**,  
345 11208 (2016).

- 346 23. Pawlowski, M. *et al.* Inducible and Deterministic Forward Programming of Human  
347 Pluripotent Stem Cells into Neurons, Skeletal Myocytes, and Oligodendrocytes. *Stem*  
348 *cell reports* **8**, 803–812 (2017).
- 349 24. de Felice, M. & di Lauro, R. Thyroid development and its disorders: Genetics and  
350 molecular mechanisms. *Endocrine Reviews* vol. 25 722–746 (2004).
- 351 25. Goulburn, A. L. *et al.* A targeted NKX2.1 human embryonic stem cell reporter line  
352 enables identification of human basal forebrain derivatives. *Stem Cells* **29**, 462–473  
353 (2011).
- 354 26. Vassart, G. & Dumont, J. E. *The Thyrotropin Receptor and the Regulation of Thyrocyte*  
355 *Function and Growth\**. vol. 13 (1992).
- 356 27. Mori, K., Mori, M., Stone, S., Braverman, L. & DeVito, W. Increased expression of  
357 tumor necrosis factor- $\alpha$  and decreased expression of thyroglobulin and thyroid  
358 peroxidase mRNA levels in the thyroids of iodide-treated BB/Wor rats. *European*  
359 *Journal of Endocrinology* **139**, (1998).
- 360 28. Dohán, O. *et al.* The sodium/iodide symporter (NIS): Characterization, regulation, and  
361 medical significance. *Endocrine Reviews* vol. 24 48–77 (2003).
- 362 29. Mincione, G. *et al.* EGF and TGF- $\beta$ 1 effects on thyroid function. *Journal of Thyroid*  
363 *Research* vol. 2011 (2011).
- 364 30. Faria, M. *et al.* TNF $\alpha$ -mediated activation of NF- $\kappa$ B downregulates sodium-iodide  
365 symporter expression in thyroid cells. *PloS one* **15**, e0228794–e0228794 (2020).
- 366 31. Romitti, M. *et al.* Single-Cell Trajectory Inference Guided Enhancement of Thyroid  
367 Maturation In Vitro Using TGF-Beta Inhibition. *Frontiers in Endocrinology* **12**, (2021).
- 368 32. Fernández, L. P., López-Márquez, A. & Santisteban, P. Thyroid transcription factors in  
369 development, differentiation and disease. *Nature Reviews Endocrinology* vol. 11 29–42  
370 (2015).

- 371 33. Dom, G. *et al.* Transcriptomic Signature of Human Embryonic Thyroid Reveals  
372 Transition From Differentiation to Functional Maturation. *Frontiers in Cell and*  
373 *Developmental Biology* **9**, (2021).
- 374 34. Lazzaro, D., Price, M., de Felice, M. & Lauro, R. di. *The transcription factor TTF-1 is*  
375 *expressed at the onset of thyroid and lung morphogenesis and in restricted regions of*  
376 *the foetal brain. Development* vol. 113 (1991).
- 377 35. Haerlingen, B. *et al.* Small-Molecule Screening in Zebrafish Embryos Identifies  
378 Signaling Pathways Regulating Early Thyroid Development. *Thyroid* **29**, (2019).
- 379 36. Vandernoot, I. *et al.* Enhanced Canonical Wnt Signaling During Early Zebrafish  
380 Development Perturbs the Interaction of Cardiac Mesoderm and Pharyngeal Endoderm  
381 and Causes Thyroid Specification Defects. *Thyroid* **31**, (2021).
- 382 37. Smith, T. J. Insulin-Like Growth Factor Pathway and the Thyroid. *Frontiers in*  
383 *endocrinology* **12**, 653627 (2021).
- 384 38. Fulop, G. M. & Phillips, R. A. The scid mutation in mice causes a general defect in DNA  
385 repair. *Nature* **347**, (1990).
- 386 39. Biedermann, K. A., Sun, J. R., Giaccia, A. J., Tosto, L. M. & Brown, J. M. scid mutation  
387 in mice confers hypersensitivity to ionizing radiation and a deficiency in DNA double-  
388 strand break repair. *Proceedings of the National Academy of Sciences of the United*  
389 *States of America* **88**, 1394–1397 (1991).
- 390 40. Brandt, M. P. *et al.* Micro-single-photon emission computed tomography image  
391 acquisition and quantification of sodium-iodide symporter-mediated radionuclide  
392 accumulation in mouse thyroid and salivary glands. *Thyroid* **22**, 617–624 (2012).
- 393 41. Abel, E. D. *et al.* Divergent roles for thyroid hormone receptor  $\beta$  isoforms in the  
394 endocrine axis and auditory system. *Journal of Clinical Investigation* **104**, (1999).



396 **Figures**

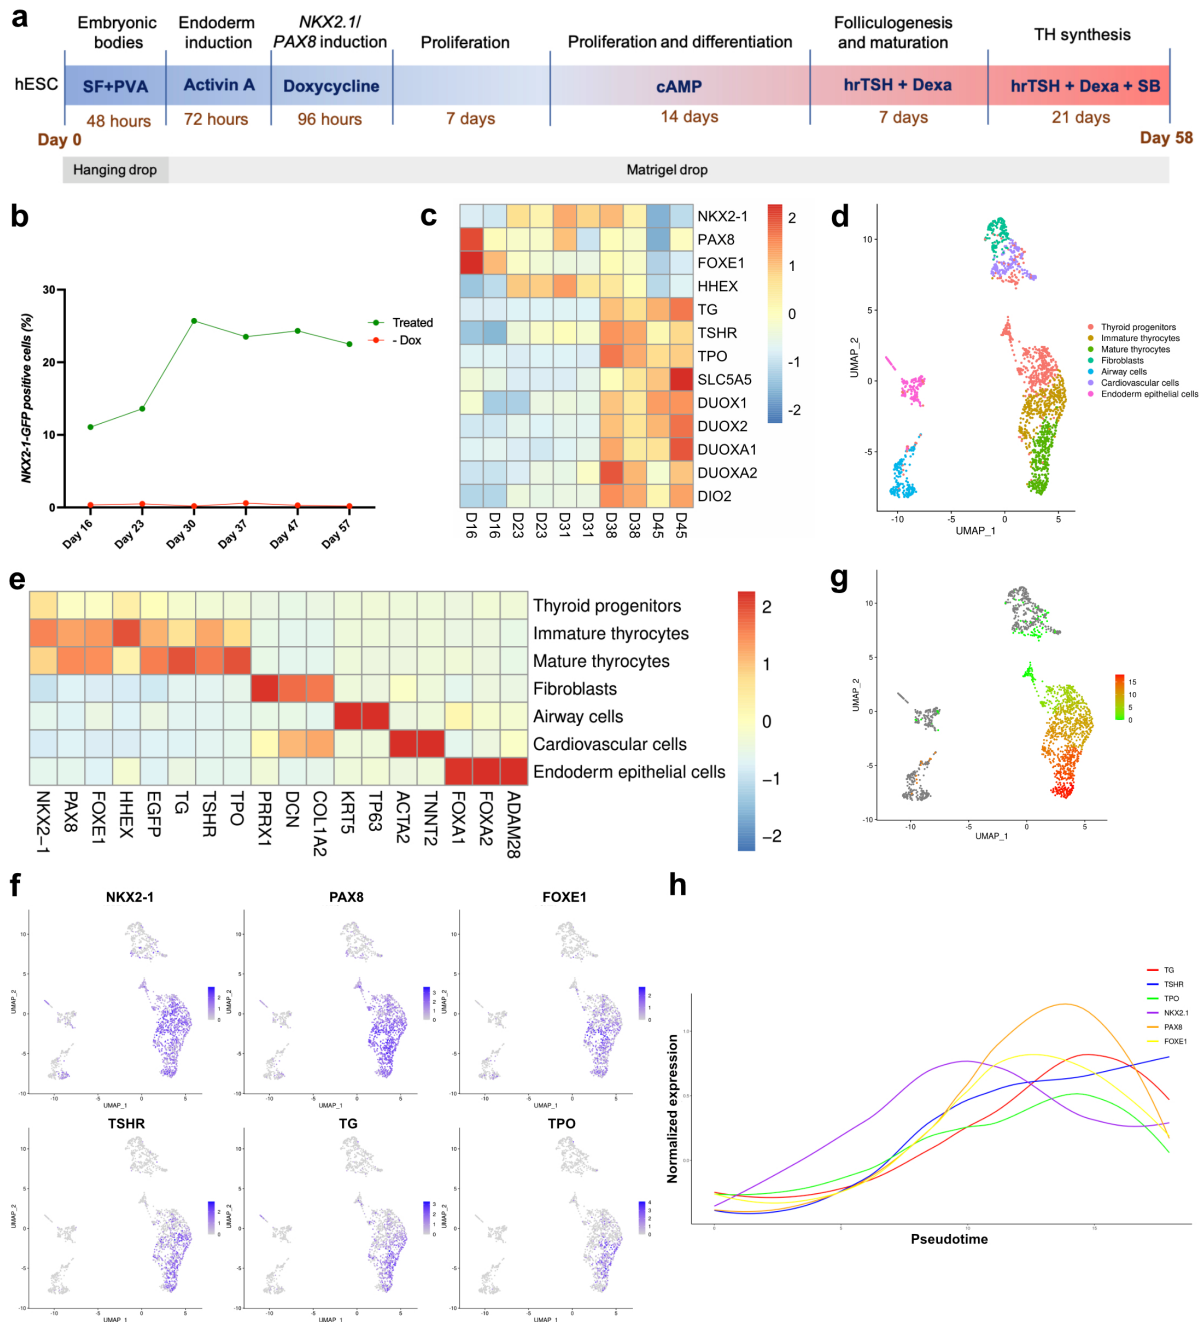

397

398 **Figure 1. Transient overexpression of *NKX2-1* and *PAX8* promotes differentiation of**

399 **human ESCs into thyroid follicular cells. (a) Schematic representation of the protocol**

400 **leading to thyroid follicle differentiation from human ESCs. (b) Quantification by flow**

401 **cytometry of the proportion of NKX2-1<sup>GFP+</sup> cells during the differentiation protocol. (c)**

402 **Heatmap of normalized bulk RNA-Seq expression of thyroid genes in NKX2-1<sup>GFP+</sup> cells at**

403 different stages of the thyroid differentiation protocol. Rows represent markers and columns  
404 represent specific time points. Color values in the heatmap represent mean expression levels.  
405 (d) Single cell RNA-Seq unsupervised clustering of *in vitro* derived human thyroid organoid  
406 model cells (day 45). Each cluster is represented by a specific color. (e) Heatmap showing  
407 normalized expression of selected marker genes with rows representing cell clusters, while  
408 columns represent genes. The intensity of the color in each square indicates the mean  
409 expression within the cluster. (f) UMAP overlaid with gene expression plots for thyrocyte  
410 markers. Color indicates normalized expression. (g) Diffusion analysis of thyrocyte lineage  
411 with thyroid progenitor cells as root cells. UMAP overlaid with pseudotime. Color in  
412 pseudotime plot indicates order of cell progression. (h) Expression trends of thyroid genes  
413 along the pseudotime trajectory.

414

415

416

417

418

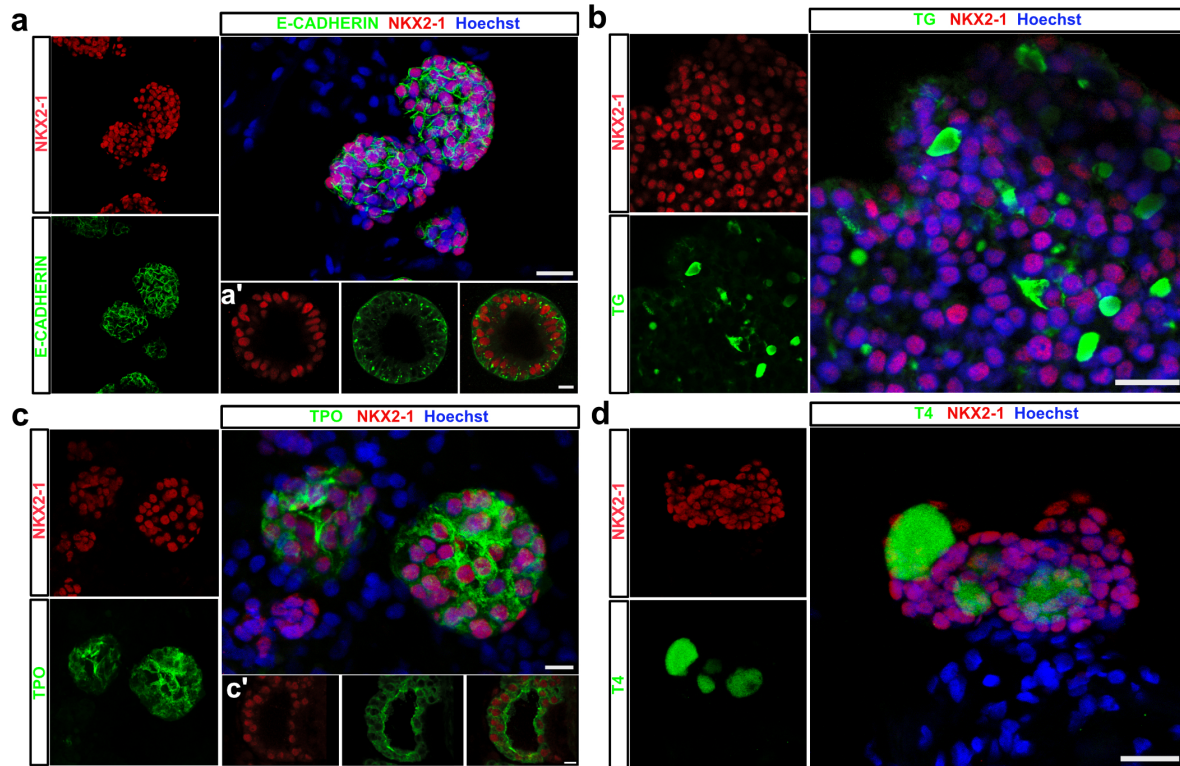

419

420 **Figure 2. Characterization of human ESC-derived thyroid follicular structures by**  
421 **immunostaining.** (a-d) Confocal immunofluorescence images at day 58 of the differentiation  
422 protocol. Three-dimensional follicular structures co-expressing NKX2-1 and (a) E-  
423 CADHERIN (a'; follicle at high magnification), (b) TG with cytosolic and luminal  
424 accumulation, (c) TPO cytoplasmic and apical membrane expression (c'; follicle at high  
425 magnification), and (d) T4 storage in the luminal compartment. Scale bars, 20 μm and 10 μm  
426 for high magnification follicles.

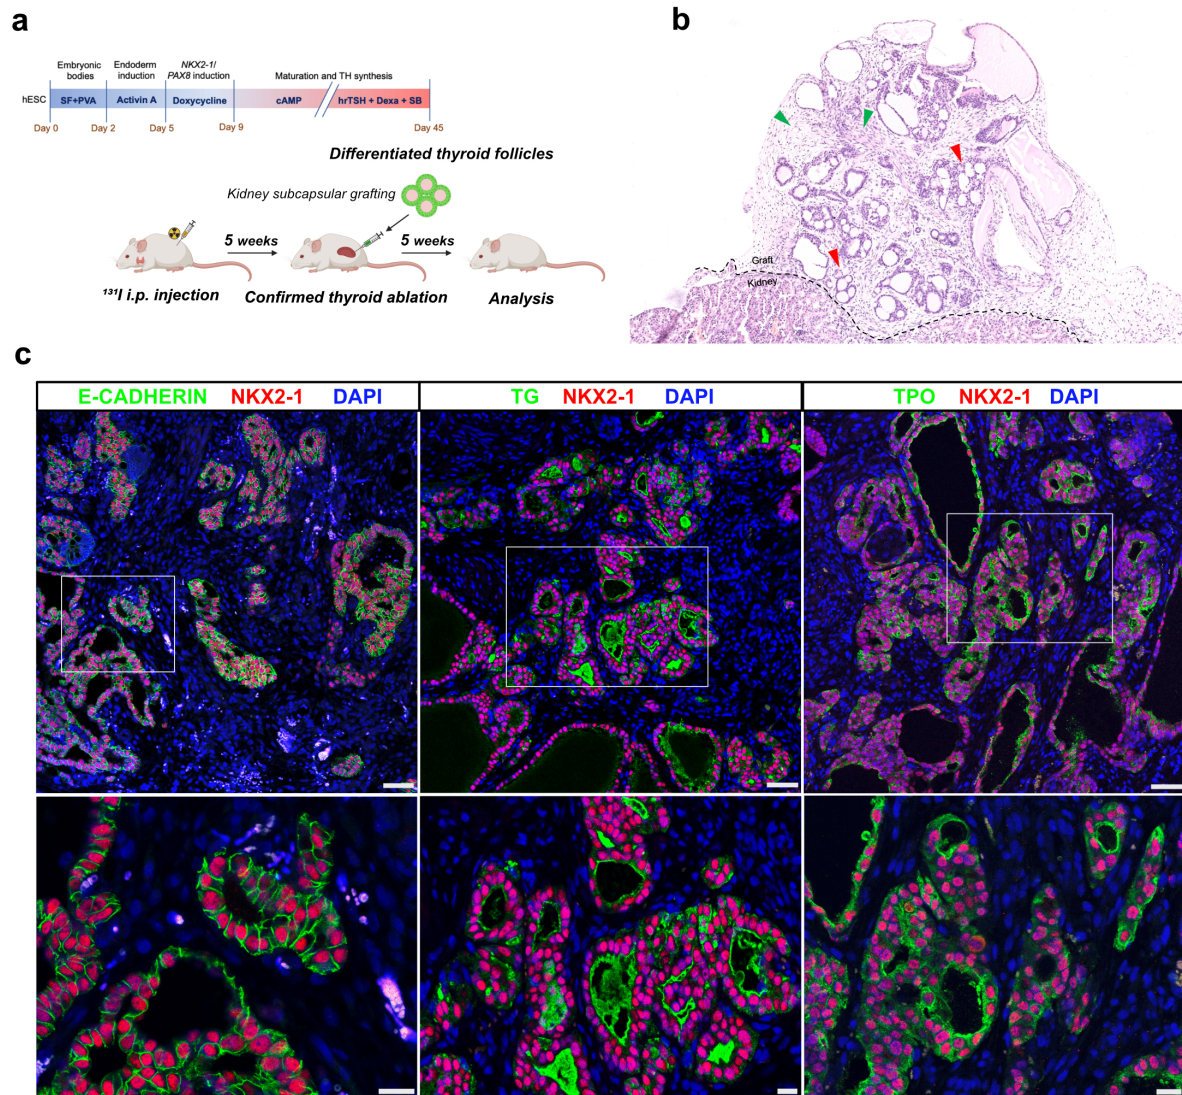

427

428 **Figure 3. Transplantation of hESC-derived enriched thyroid follicles into NOD-SCID**

429 **mice.** (a) Schematic representation of the hESC-derived thyroid follicles transplantation

430 the kidney capsule protocol in NOD-SCID untreated mice or previously thyroid RAI ablated

431 by intraperitoneal <sup>131</sup>I injection. (b-c) Histological analysis of the grafted sections 5 weeks after

432 transplantation. (b) Hematoxylin and eosin-stained sections of the transplanted organoids show

433 the localization of the generated human thyroid follicles in the cortical region of the host

434 kidney. Red arrows show the organization of the monolayer epithelium of the transplanted

435 tissue surrounded by stromal cells (green arrows).

436 Confocal images show co-expression of NKX2-1 and E-CADHERIN in the monolayered epithelially organized follicular structures.

437 The grafted tissue shows that TG is principally accumulated in the luminal compartment,  
438 whereas TPO is strongly expressed in the apical membrane. Scale bars, 50 $\mu$ m (upper images)  
439 and 20 $\mu$ m (zoomed lower images).

440

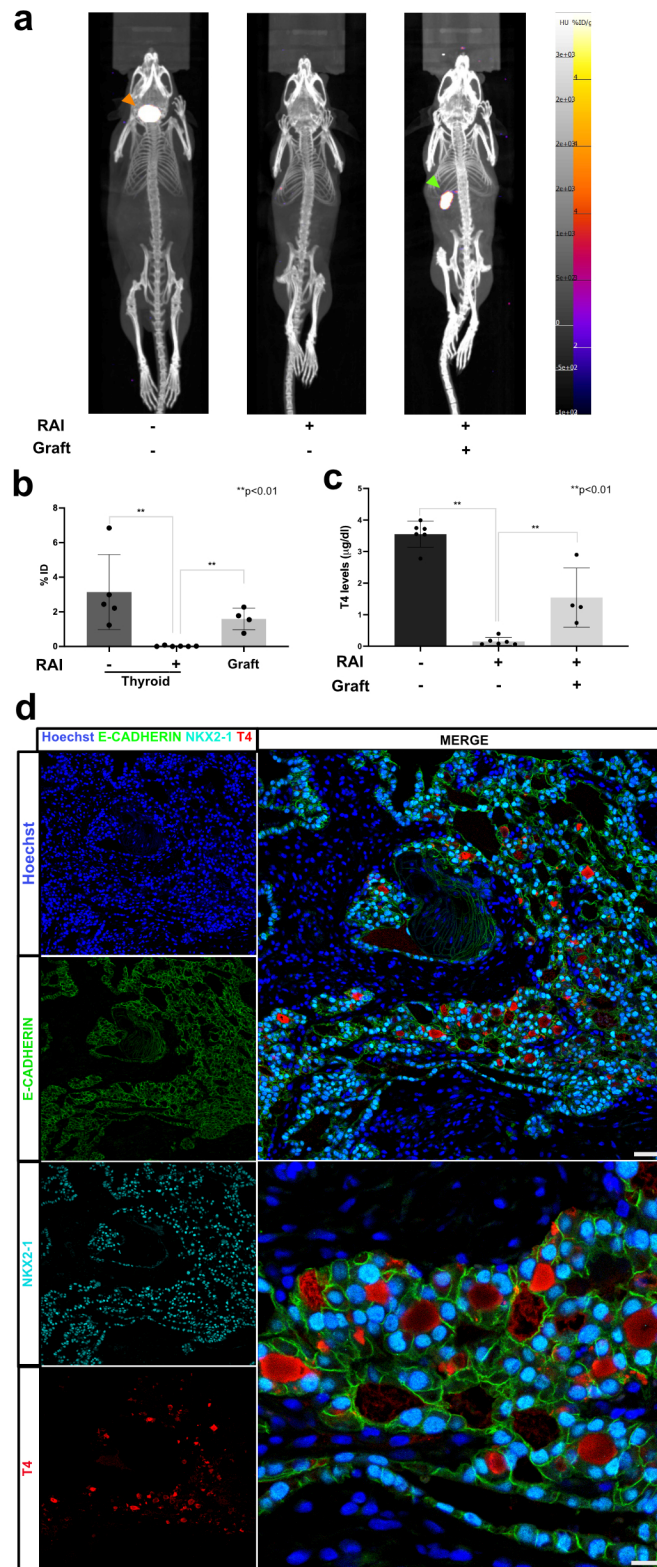

441

442 **Figure 4. *In vivo* functionality of transplanted human ESC-derived thyroid follicles. (a)**

443 Maximum intensity projections generated from SPEC/CT images of non-irradiated and non-

444 transplanted (left), RAI-ablated and non-transplanted (middle), and RAI-ablated and

445 transplanted (right) mice. Images were obtained four weeks after organoids transplantation.  
446 The  $^{123}\text{I}$  uptake in the mouse thyroid tissue is shown by the orange arrow, while the signal from  
447 the human thyroid tissue (graft) is highlighted by the green arrow. The color scales are chosen  
448 to represent the radioactivity uptake in PET images expressed as standardized uptake values  
449 (SUV) (0 to 8, from light yellow to dark blue). (b) Quantification of  $^{123}\text{I}$  uptake in SPECT  
450 images expressed as percentage of injected dose (% ID) in the intact (non-irradiated) (2.44  
451 (1.72-4.91) % ID; n=5) or RAI-ablated thyroid region (0.01 (0.002-0.03) % ID; n=6), and  
452 grafted tissue (1.66 (0.96-2.14) % ID; n=4). (c) Comparison of plasma T4 levels among  
453 controls (3.63 (3.35-3.80)  $\mu\text{g}/\text{dl}$ ; n=6), irradiated/non-transplanted (0.11 (0.06-0.23)  $\mu\text{g}/\text{dl}$ ;  
454 n=6) and irradiated/transplanted mice (1.26 (0.86-2.49)  $\mu\text{g}/\text{dl}$ ; n=4). (d) NKX2-1, E-  
455 CADHERIN and T4 immunostaining demonstrate the presence of hESC-derived follicles in  
456 the transplanted area with specific accumulation of T4 within the lumen of several structures.  
457 Mann-Whitney test was used for statistical analysis. \*\*p<0.01.

458

459

460

461

462

463

464

465

466

467

468

469

470 **Extended data**

471

472 **METHODS**

473

474 **Generation of tetracycline-induced hESC line:** The human embryonic stem cell line HES3  
475 used in this study was genetically modified at the NKX2-1 locus to allow insertion of sequences  
476 encoding green fluorescent protein (GFP), resulting in the NKX2-1<sup>wt/GFP</sup> hESC line as  
477 previously described <sup>25</sup> (Extended data Fig. 1a). To generate an inducible NKX2-1-PAX8  
478 hESC line, we cloned the coding sequences of the *NKX2-1* and *PAX8* genes, separated by a  
479 IRES sequence, into the pInducer20 lentiviral vector (a gift from Stephen Elledge; Addgene  
480 plasmid # 44012; <http://n2t.net/addgene:44012>; RRID: Addgene\_44012), which contains the  
481 sequences for the TRE/rtTA-inducible system (Extended data Fig. 1b). Lentiviral supernatants  
482 were generated by transient transfection of HEK293 cells according to Lipofectamine™ 2000  
483 (Invitrogen) transfection protocols and harvested 48 h after transfection. To promote  
484 integration of sequences into the genome of the NKX2-1<sup>wt/GFP</sup> HES3 line, hESCs were plated  
485 at high density (1:3) in a Matrigel-coated 6-well culture dish and infected with 50 ml of  
486 lentivirus supernatant and 6 µg/ml polybrene for 18-20 hours in mTeSR medium (Stem Cell).  
487 Positive clones were selected with 300 µg/ml neomycin (Invitrogen). Clones were treated with  
488 1 mg/ml doxycycline (Sigma) for 48 h and screened by immunostaining against NKX2-1 and  
489 PAX8 to verify transgene expression. Selected clones were tested for genomic integrity using  
490 G-banding technique according to the protocol described previously <sup>42</sup>. Pluripotency was  
491 assessed by testing the ability of the clones to differentiate into cells from the three germ layers.  
492 Cells were cultured in basal differentiation medium (Extended data Table 1) for 21 days and  
493 the formation of endoderm, mesoderm and ectoderm cells was assessed by  
494 immunofluorescence staining against AFP, α-SMA and β-III tubulin, respectively. The hESC-



495 NKX2-1-PAX8 line was registered and approved by the European Human Pluripotent Stem  
496 Cell Registry (hPSCreg) as ESIBIe003-A-6.

497

498 **hESC culture and differentiation:** Modified hESCs were cultured and propagated on  
499 Matrigel-coated 6-well culture dishes in Stem Flex medium (Thermo Scientific, A3349401)  
500 supplemented with 100 U/ml Penicillin-Streptomycin (Gibco). For the generation of embryoid  
501 bodies (EBs), highly confluent hESCs were detached with 0.5 mM EDTA solution and diluted  
502 with 100,000 cells/ml in Stem Flex medium supplemented with 4 mg/ml polyvinyl alcohol  
503 (PVA; Sigma) and EBs formation was induced as previously described<sup>16,20</sup>. Briefly, hESCs  
504 (2,000 cells per droplet) were cultured in hanging drops for two days, then EBs were collected  
505 and embedded in growth factor-reduced Matrigel (BD Biosciences); 50 µl Matrigel drops  
506 (containing approximately 20 embryoid bodies per drop) were replated onto 12-well dishes.  
507 Embryoid bodies were differentiated and cultured in differentiation medium containing  
508 DMEM/F12+Glutamax (Gibco) with 20% FBS (Gibco), 0.1 mM non-essential amino acids  
509 (Gibco), 1 mM sodium pyruvate (Gibco), 0.1 mM 2-mercaptoethanol (Sigma), 100 U/ml  
510 Penicillin-Streptomycin (Gibco), and 50 µg/ml L-ascorbic acid (Sigma). Cells were  
511 supplemented with 50 ng/ml Activin A (Cell GS) for three days to induce foregut endoderm.  
512 Expression of *NKX2-1* and *PAX8* was induced by incubation with 1 mg/ml doxycycline (Dox;  
513 Sigma) for four days. Cells were then cultured in basal differentiation medium for one week to  
514 allow expansion of thyroid progenitors, while differentiation and maturation were induced by  
515 treatment with 300 µM 8-br-cAMP (Biolog Inc.), 1 mU/ml rhTSH (Genzyme), 50 nM  
516 dexamethasone (Dexa; Sigma) and 10 µM SB431542 (Peprotech) where indicated (Figure 1a).  
517 Culture medium was changed every 48 hours.

518

519 **NKX2-1<sup>GFP+</sup> population assessment – Flow cytometry:** hESCs under the thyroid  
520 differentiation protocol were collected each week, from day 16 to day 45, and prepared for  
521 flow cytometry immunostaining as follows: Matrigel drops (at least 4 samples per time point)  
522 were first digested with HBSS solution containing 10 U/ml dispase II (Roche) and 125 U/ml  
523 collagenase type IV (Gibco, Thermo Fisher) for 30-60 min at 37°C; then a single cell  
524 suspension was obtained by dissociation with TripLE Express (Thermo Fisher) for 10-15 min  
525 incubation at 37°C, the enzymes were inactivated by addition of differentiation medium. After  
526 centrifugation, samples were rinsed with PBS and fixed in 1.6% PFA solution in PBS for 15  
527 min at RT, followed by cell permeabilization with 0.1% Triton solution in PBS for 15 min at  
528 4°C under agitation. After centrifugation, 4% horse serum and 0.5% Tween 20 PBS blocking  
529 solution was added for 10 min (4°C with shaking). The primary anti-rabbit KI67 antibody  
530 (1:100) was diluted in the blocking solution and samples were incubated for 30 min (4°C with  
531 shaking). Cells were then rinsed three times with wash solution (0.5% BSA and 0.5% Tween  
532 in PBS) and then incubated with Cy5-conjugated anti-rabbit antibody (1:300) diluted in  
533 blocking solution for 30 min (4°C with shaking). NKX2-1<sup>GFP+</sup> and K67 expression data were  
534 obtained and processed using an LSR-Fortessa X-20 flow cytometer and FACSDiva software  
535 (BD Biosciences). Unstained cells and isotype controls were included in all experiments. In  
536 addition, the percentage of GFP+ cells was used to estimate the thyroid generation efficiency  
537 of our protocol.

538

539 **RNA extraction and quantitative real-time PCR:** For total RNA extraction, human  
540 organoids (at different time points), *in vivo* samples, and human thyroid tissue (histologically  
541 normal thyroid tissue was obtained from a patient undergoing thyroidectomy; Hopital Erasme-  
542 ULB Ethics Committee approval; P2016/260), was lysed using RLT lysis buffer supplemented  
543 with 1% 2-mercaptoethanol (Sigma), and RNA isolation was performed using the RNeasy

544 micro kit (Qiagen) according to the manufacturer's instructions. For reverse transcription, the  
545 Superscript II kit (Invitrogen) was used, and qPCR was performed in triplicates using Takyon  
546 (Eurogentec) and CFX Connect Real-Time System (Biorad). Results are presented as  
547 linearized values normalized to housekeeping gene, GAPDH (human) or  $\beta$ 2-microglobulin  
548 (mouse) and the indicated reference value ( $2^{-\Delta\Delta Ct}$ ). Gene expression profile was obtained  
549 from at least three independent experiments. Primer sequences are shown in Table 3.

550

551 **RNA-seq and analysis of bulk samples:** Bulk RNA-seq was performed in hESC-  
552 differentiated cells every week from day 16 to day 45 of our differentiation protocol (Figure  
553 1a). The NKX2-1<sup>GFP+</sup> cell population was obtained by FACS sorting (FACS Aria; BD  
554 Bioscience) after sample preparation was performed as previously described (section "NKX2-  
555 1<sup>GFP+</sup> population expansion assessment - Flow Cytometry"). In brief, 10,000 NKX2-1<sup>GFP+</sup> cells  
556 were directly sorted into 700  $\mu$ l of Qiazol lysis reagent (Qiagen) and RNA isolation was  
557 performed using the miRNeasy micro kit (Qiagen) according to the manufacturer's instructions.  
558 RNA concentration and quality were evaluated using Bioanalyser 2100 (Agilent) and RNA  
559 6000 Nano Kit (Agilent). RNA integrity was preserved, and no genomic DNA contamination  
560 was detected. Ovarion Solo RNA-seq Systems (NuGen) was used as indicated by the  
561 manufacturer, resulting in high-quality indexed cDNA libraries quantified with the Quant-iT  
562 PicoGreen kit (Life Sciences) and Infinite F200 Pro plate reader (Tecan); DNA fragment size  
563 distribution was examined with the 2100 Bioanalyzer (Agilent) using the DNA 1000 kit  
564 (Agilent). Multiplexed libraries (10pM) were loaded onto flow cells and sequenced on the  
565 HiSeq 1500 system (Illumina) in high-output mode using the HiSeq Cluster Kit v4 (Illumina).  
566 Approximately 10 million paired-end reads were obtained per sample. After removal of low-  
567 quality bases and Illumina adapter sequences using Trimmomatic software <sup>43</sup>, sequence reads  
568 were aligned against the human reference genome (Hg19) using HiSat2 software <sup>44</sup>. Raw reads

569 were determined with HTSeq software <sup>45</sup> using the Ensembl genome annotation GRCh38.p13.  
570 Normalization and differential expression analyzes were performed with two biological  
571 replicates per sample using the website iDEP version 0.93 <sup>46</sup>. Genes for which expression  
572 values were lower than 5 were filtered out. The fold changes of mean gene expression for the  
573 duplicates were used to calculate the level of differential gene expression.

574

575 **Single cell RNAseq characterization of thyroid organoids:** Cells originating from human  
576 thyroid differentiation protocol, at day 45, were isolated for scRNAseq profiling, following the  
577 procedures previously described <sup>31</sup>. Single cell suspension preparation and FACS cell sorting  
578 were performed as previously mentioned (“Cell proliferation assessment – Flow cytometry”  
579 and RNA-seq and analysis of bulk samples sections). Different proportions of viable NKX2-  
580 1/GFP+ (60%) and NKX2-1/GFP- (40%) cells were sorted to guarantee representation of the  
581 distinct cell types present in the organoid culture. Sorted cells were collected in PBS at a density  
582 of 800cells/ul and diluted accordingly to kit’s instruction (10x Genomics Chromium Single  
583 Cell 3’ v3). Around 6,000 cells were loaded onto a channel of the Chromium Single Cell 3’  
584 microfluidic chip and barcoded with a 10X Chromium controller followed by RNA reverse  
585 transcription and amplification according to manufacturer’s recommendations (10X  
586 Genomics). Library preparation was performed based on 10x Genomics guidelines. Libraries  
587 were sequenced using Illumina NovaSeq 6000 system.

588

589 **Single cell RNAseq data analysis:** Raw sequencing data was aligned, annotated,  
590 demultiplexed and filtered using Cell Ranger Software (v.6.0.1) with a custom-built reference.  
591 The custom-built reference was based on the human reference genome GRCh38 and gene  
592 annotation Ensembl 98 in which the EGFP sequence was included. The new reference was  
593 generated using the cellranger mkref function from the Cell Ranger Software. Analyses were

594 done using R 4.1.0 and Seurat version 4.0.3 <sup>47</sup>. Briefly, raw counts from Cell Ranger were  
595 loaded and the “background soup” was removed using SoupX <sup>48</sup>. The background soup refers  
596 to ambient RNA molecules contaminating cell-containing droplets, a common problem in  
597 droplet-based single cell RNA-sequencing technologies. Decontaminated UMIs were then  
598 filtered to discard any doublet (droplet containing two cells instead of 1) using DoubletFinder  
599 <sup>49</sup>. Finally, cells containing less than 200 unique genes or more than 26% of UMI counts related  
600 to mitochondrial genes were discarded. The 26% threshold was selected to discard dying cells  
601 while retaining as much barcodes as possible. The resulting library was scaled and normalized  
602 using the SCTransform function from Seurat. Cell cycle effects and mitochondrial content were  
603 used as variables to regress out with SCTransform. Principal component analysis (PCA) was  
604 computed using the 3000 first variable features, and the top 30 principal components were used  
605 for SNN graph construction, clustering (resolution 1) and UMAP embedding using Seurat’s  
606 functions and recommended methods. Cluster annotation was based on marker genes obtained  
607 using Seurat’s FindAllMarkers function and literature survey. Pseudotime analysis in thyroid  
608 populations was performed using Monocle3 <sup>50</sup> with default parameters and with data imported  
609 from the Seurat object, selecting thyroid progenitors as root cells. Pseudotime-related plots  
610 were generated using the FeaturePlot function from Seurat and the geom\_smooth function from  
611 ggplot2. Receptor-ligand interaction analysis was done with CellPhoneDB, which consists in  
612 a public repository of ligands, receptors and their interactions enabling a comprehensive and  
613 systematic analysis of cell–cell communication <sup>51</sup>. CellphoneDB was run using the statistical  
614 method with default parameters. A manually selected list of biologically relevant ligand-  
615 receptor pairs displaying statistically significant interaction was used to create the dot plot  
616 showing the interactions of thyroid populations with other cell populations.  
617

618 **Follicles enrichment for *in vivo* transplantation:** Thyroid organoids at day 45 of  
619 differentiation were washed twice with Hanks's balanced salt solution (HBSS, containing  
620 calcium and magnesium; Gibco), then 1 ml of a digestion medium containing 10 U ml dispase  
621 II (Roche) and 125 U ml of collagenase type IV (Sigma) diluted in HBSS was added to each  
622 well. The organoids were carefully removed using a 5 ml pipette and transferred to a sterile  
623 Erlenmeyer and incubated at 37 °C in a water bath with shaking for 45 - 60 min. The release  
624 of thyroid follicles was tracked by microscopy (bright field and GFP). When isolated structures  
625 were detected, enzymes were inactivated by addition of 10% FBS followed by centrifugation  
626 at 500 g for 3 min. Cells were rinsed twice with HBSS and the follicles population was enriched  
627 using 30 µm (single cell removal) and 100 µm (follicles enrichment; 30-100 µm size) reverse  
628 strainer (Pluriselect). Finally, the 3D-structures were counted and approximately 10,000  
629 structures were resuspended in 65 µl of differentiation medium for *in vivo* transplantation.

630

631 **RAI-induced hypothyroidism mouse generation, transplantation of hESC-derived**  
632 **thyroid follicles and SPECT-CT imaging:** All animal experiments were performed in  
633 accordance with local Animal Ethics (Ethical Project CMMI-2020-01). A cohort of 20 five-  
634 week-old female non-obese and non-diabetic mice with severe combined immunodeficiency  
635 (NOD -SCID) (Charles River Laboratories, France) was placed on an iodine-deficient diet for  
636 one week after arrival. In addition, six NOD -SCID mice, not submitted to any treatment were  
637 included in the study as external controls. One week after starting the diet (first week), 14 of  
638 the 20 mice were injected intraperitoneally with approximately 5.75 MBq (90µL supplemented  
639 with 10 µL NaCl 0.9% solution (MiniPlasco, BBraun) Iodide <sup>131</sup>I-Injection-IBS.2P (GE  
640 Healthcare Belux, Belgium). To confirm the destruction of functional thyroid tissue by <sup>131</sup>I  
641 injection, SPECT-CT images of Sodium Iodide <sup>123</sup>I uptake were obtained on a nanoSPECTPlus  
642 (for the SPECT) and a nanoScanPETCT (for the CT) (Mediso, Hungary) equipped with a

643 Minerve rat cell implemented with a mouse insert. In the fourth week, the 20 mice were injected  
644 intravenously with 8.75-9.33 MBq  $^{123}\text{I}$  24 hours before imaging. SPECT/CT imaging was  
645 performed on two mice in parallel under isoflurane anesthesia (1.8% isoflurane, 2.0 l/min O<sub>2</sub>)  
646 with the following parameters: collimator aperture APT105, 'fast' helicoidal acquisition mode  
647 with a duration of 50 s/projection to acquire 1000 counts per projection, scan range of 105 mm,  
648 reconstruction in standard mode, i.e. 35% smoothing, 3 iterations and 3 subsets to obtain a  
649 voxel size of 750  $\mu\text{m}^3$ . CT was performed with the following parameters: 480 projections,  
650 minimum zoom, binning 1:4, 50 kV, 300 ms/proj, scan range of 115 mm. Acquisition data  
651 were reconstructed with a Feldkamp-based algorithm generated to obtain a cubic voxel of  
652 250  $\mu\text{m}^3$ , using a cosine filter with a cut-off of 100%. Then, one week later (week five) 6  
653 irradiated mice were transplanted with thyroid organoids. First, control and thyroid gland  
654 ablated mice were treated with 0.01 mg/ml - 50  $\mu\text{l}$  Temgesic (Schering Plow), anesthetized  
655 under isoflurane anesthesia, and the eyes/cornea were protected with Vidisic gel (Bausch &  
656 Lomb Inc.). Mice were injected with 8  $\mu\text{l}$  of follicle-enriched suspension thyroid organoids  
657 (described in "Enrichment of follicles for *in vivo* transplantation") into the unilateral kidney  
658 under the capsule using a 30G needle syringe (Hamilton Bonaduz AG) (the kidney was exposed  
659 through skin/muscle/peritoneum incision via a dorsolateral approach). The entire cohort of  
660 mice was imaged 4 weeks after transplantation (week 9) as described above to assess the iodine  
661 uptake capacity of the transplanted tissue. Due to the radiosensitivity of immunodeficient mice  
662 <sup>38,39</sup>, 30% of the irradiated animals died during the experimental period. At the end of the  
663 experiment (week ten), 6 non-transplanted and 4 transplanted mice had survived and could be  
664 analyzed. Mice were finally sacrificed, blood collection was performed for the T4 assay, while  
665 the kidney and transplanted tissues were harvested for transcriptomic and histological analyzes.  
666 Qualitative and quantitative analysis of the images was performed using VivoQuant v3.5  
667 software (InVivo, USA). Radioiodine uptake in thyroid tissue and/or graft was evaluated

668 according to the design of volumes of interest (VOI) based on the corresponding radioactive  
669 signal. The % injected dose (% ID) was calculated as previously described by Brandt, et al,  
670 2012<sup>40</sup> and results were expressed as % ID/organ<sup>40</sup>.

671

672 **Plasma T4 measurement:** Total T4 levels were measured by Mouse/Rat T4 Total ELISA kit  
673 (T4044T-100 Calbiotech) according to the manufacturer's instructions.

674

675 **Immunofluorescence staining:** For immunofluorescence staining, cells cultured in monolayer  
676 or MTG -drop were fixed in 4% paraformaldehyde (PFA; Sigma) for 2 h at RT, washed three  
677 times in PBS, and blocked in 3% bovine serum albumin (BSA; Sigma), 5% horse serum  
678 (Invitrogen), and 0.3% Triton X-100 (Sigma) PBS solution for 30 min at room temperature.  
679 Primary and secondary antibodies were diluted in a PBS solution of 3% BSA, 1% horse serum,  
680 and 0.1% Triton X-100. Primary antibodies were incubated overnight at 4°C, then washed three  
681 times and incubated with secondary antibodies for 2 h at room temperature. The nuclei were  
682 stained with Hoechst 33342 (Invitrogen). The slides were mounted with Glycergel (Dako). For  
683 paraffin embedding, *in vitro* organoids and grafted samples were fixed overnight at 4°C in 4%  
684 PFA and kept in 70% ethanol at 4°C for at least 24 hours at 4°C before embedding. Samples  
685 were then embedded in paraffin, sectioned (5 µm), mounted on glass slides, deparaffinized,  
686 and rehydrated. For histological analysis, sections were stained with hematoxylin and eosin  
687 (H&E) according to a routine protocol. For immunostaining, antigen retrieval was performed  
688 by incubating the sections for 10 min in the microwave (850 W) in Sodium Citrate Buffer (10  
689 mM Sodium Citrate, 0.05% Tween 20, pH 6.0). After cooling, the sections were rinsed with  
690 PBS and then blocked with 1% BSA and 10% horse serum PBS solution for 1 h at RT. Primary  
691 antibodies were diluted in the blocking solution and incubated overnight at 4°C. The sections  
692 were rinsed three times in PBS and incubated with Hoechst 33342 (Invitrogen) and secondary



693 antibodies diluted in blocking solution for 1 h at room temperature. Slides were mounted with  
694 Glycergel (Dako). Information on antibodies and sources are listed in Extended Data Table 2.

695

696 **Imaging:** Fluorescence imaging was performed on a Zeiss LSM510 META confocal  
697 microscope, a Zeiss Axio Observer Z1 microscope with AxioCamMR3 camera, and a Leica  
698 DMI6000 with DFC365FX camera. Hematoxylin and eosin whole slide images were acquired  
699 using a NanoZoomer- SQ digital slide scanner C13140-01 (Hamamatsu) and images were  
700 generated using NDP.view 2 software (Hamamatsu).

701

702 **Statistical analysis:** Statistical significance between two groups was tested using the unpaired  
703 t test or the nonparametric Mann-Whitney U test, while comparison between multiple groups  
704 was performed using one-way ANOVA or Kruskal-Wallis tests. Data are presented as mean  $\pm$   
705 SD or median (IQR). Differences were considered significant at  $p < 0.05$ . GraphPad Prism  
706 version 9 was used for most analyses (GraphPad Software). Data presented are from at least  
707 three independent experiments.

708

#### 709 **Data availability**

710 Bulk RNA-seq and Single-cell RNA-seq data have been deposited in the NCBI Gene  
711 Expression Omnibus under accession number GSE181452 and GSE181256, respectively.  
712 Source data are provided with this paper.

713

#### 714 **Code availability**

715 Custom computer script used to generate scRNAseq data are available upon request.

716

717

718 **Methods references**

- 719 42. Campos, P. B., Sartore, R. C., Abdalla, S. N. & Rehen, S. K. Chromosomal spread  
720 preparation of human embryonic stem cells for karyotyping. *Journal of*  
721 *Visualized Experiments* (2009) doi:10.3791/1512.
- 722 43. Bolger, A. M., Lohse, M. & Usadel, B. Trimmomatic: a flexible trimmer for  
723 Illumina sequence data. *Bioinformatics* **30**, (2014).
- 724 44. Kim, D., Langmead, B. & Salzberg, S. L. HISAT: a fast spliced aligner with low  
725 memory requirements. *Nature Methods* **12**, (2015).
- 726 45. Anders, S., Pyl, P. T. & Huber, W. HTSeq--a Python framework to work with  
727 high-throughput sequencing data. *Bioinformatics* **31**, (2015).
- 728 46. Ge, S. X., Son, E. W. & Yao, R. iDEP: an integrated web application for  
729 differential expression and pathway analysis of RNA-Seq data. *BMC*  
730 *Bioinformatics* **19**, (2018).
- 731 47. Hao, Y. *et al.* Integrated analysis of multimodal single-cell data. *Cell* **184**, 3573-  
732 3587.e29 (2021).
- 733 48. Young, M. D. & Behjati, S. SoupX removes ambient RNA contamination from  
734 droplet-based single-cell RNA sequencing data. *GigaScience* **9**, (2020).
- 735 49. McGinnis, C. S., Murrow, L. M. & Gartner, Z. J. DoubletFinder: Doublet  
736 Detection in Single-Cell RNA Sequencing Data Using Artificial Nearest  
737 Neighbors. *Cell Systems* **8**, (2019).
- 738 50. Cao, J. *et al.* The single-cell transcriptional landscape of mammalian  
739 organogenesis. *Nature* **566**, 496–502 (2019).
- 740 51. Efremova, M., Vento-Tormo, M., Teichmann, S. A. & Vento-Tormo, R.  
741 CellPhoneDB: inferring cell–cell communication from combined expression of  
742 multi-subunit ligand–receptor complexes. *Nature Protocols* **15**, (2020).

743 **Acknowledgements**

744 We acknowledge the ULB flow cytometry platform (Christine Dubois), the ULB genomic core  
745 facility (F. Libert and A. Lefort), LiMIF platform for confocal microscopy (J.-M.  
746 Vanderwinden), Coraline De Maeseneire, Nicolas Passon and Christophe Van Heymbeek  
747 (CMMI) for their contribution for the *in vivo* studies. We also acknowledge Professor Andrew  
748 G Elefanty for kindly providing human ESC cell line (HES3-NKX2-1<sup>WT/GFP</sup>). Schematic  
749 grafting diagram was created with BioRender.com.

750

751 **Author Contributions**

752 M.R. and S.C. developed the project, designed the experiments and analyzed the data. D.F.K  
753 generated and selected the hESC-NKX2-1/Pax8 line. M.R., B.F.F and O.M. performed most  
754 of the *in vitro* experiments and protocol set up. L.C. performed cell culture, maintenance and  
755 karyotype analysis. S.C., M.R and G.D. executed *in vivo* studies. G.D., G.V.S. and S.G.  
756 acquired SPECT-CT images and run the % ID analysis. M.R., B.F.F., H.L. analyzed RNA  
757 expression and performed IF. P.G. obtained confocal images. M.R. and H.L. performed bulk  
758 RNA-Sequencing and analyzed the results. M.R., S.P.S. and B.F.F performed the single-cell  
759 RNA-Sequencing. A.T., V.D., B.F.F. S.P.S., S.E.E. and H.L. performed the bioinformatics  
760 analysis. S.C. and M.R. wrote the first draft and S.P.S. and S.R. edited the manuscript. S.C.  
761 and S.R. acquired funding for the project. All authors contributed to the article and approved  
762 the submitted version.

763

764 **Competing interests:** The authors declare no competing interests.

765

766

767

768 **Funding**

769 This work was supported by grants from the Belgian National Fund for Scientific Research  
770 (FNRS) (PDR T.0140.14; PDR T.0230.18), the Fonds d'Encouragement à la Recherche de  
771 l'Université Libre de Bruxelles (FER-ULB) and it has received funding from the European  
772 Union's Horizon 2020 research and innovation programme under grant agreement No. 825745.  
773 M.R. was supported in part by the Brazilian National Council for Scientific and Technological  
774 Development (CNPq; Brazil). Work by S.P.S. was supported by MISU funding from the FNRS  
775 (34772792 – SCHISM). The Center for Microscopy and Molecular Imaging (CMMI) is  
776 supported by the European Regional Development Fund (ERDF), the Walloon Region, the  
777 Fondation ULB, the Fonds Erasme and “Association Vinçotte Nuclear” (AVN). G.D. is  
778 supported by European Regional Development Fund (ERDF) and the Walloon Region. M.R.  
779 was supported by FNRS (Chargé de Recherche) and grant agreement No.825745. B.F.F. and  
780 S.R. were supported in part by grant DK15070 from The National Institutes of Health (USA).  
781 S.C is Research Director at FNRS.

782

783 **Supplementary Information is available for this paper.** Correspondence and requests for  
784 materials should be addressed to Sabine Costagliola: [sabine.costagliola@ulb.be](mailto:sabine.costagliola@ulb.be).

785

786

787

788

789

790

791

792

793 **Extended Data**

794

795 **Figures**

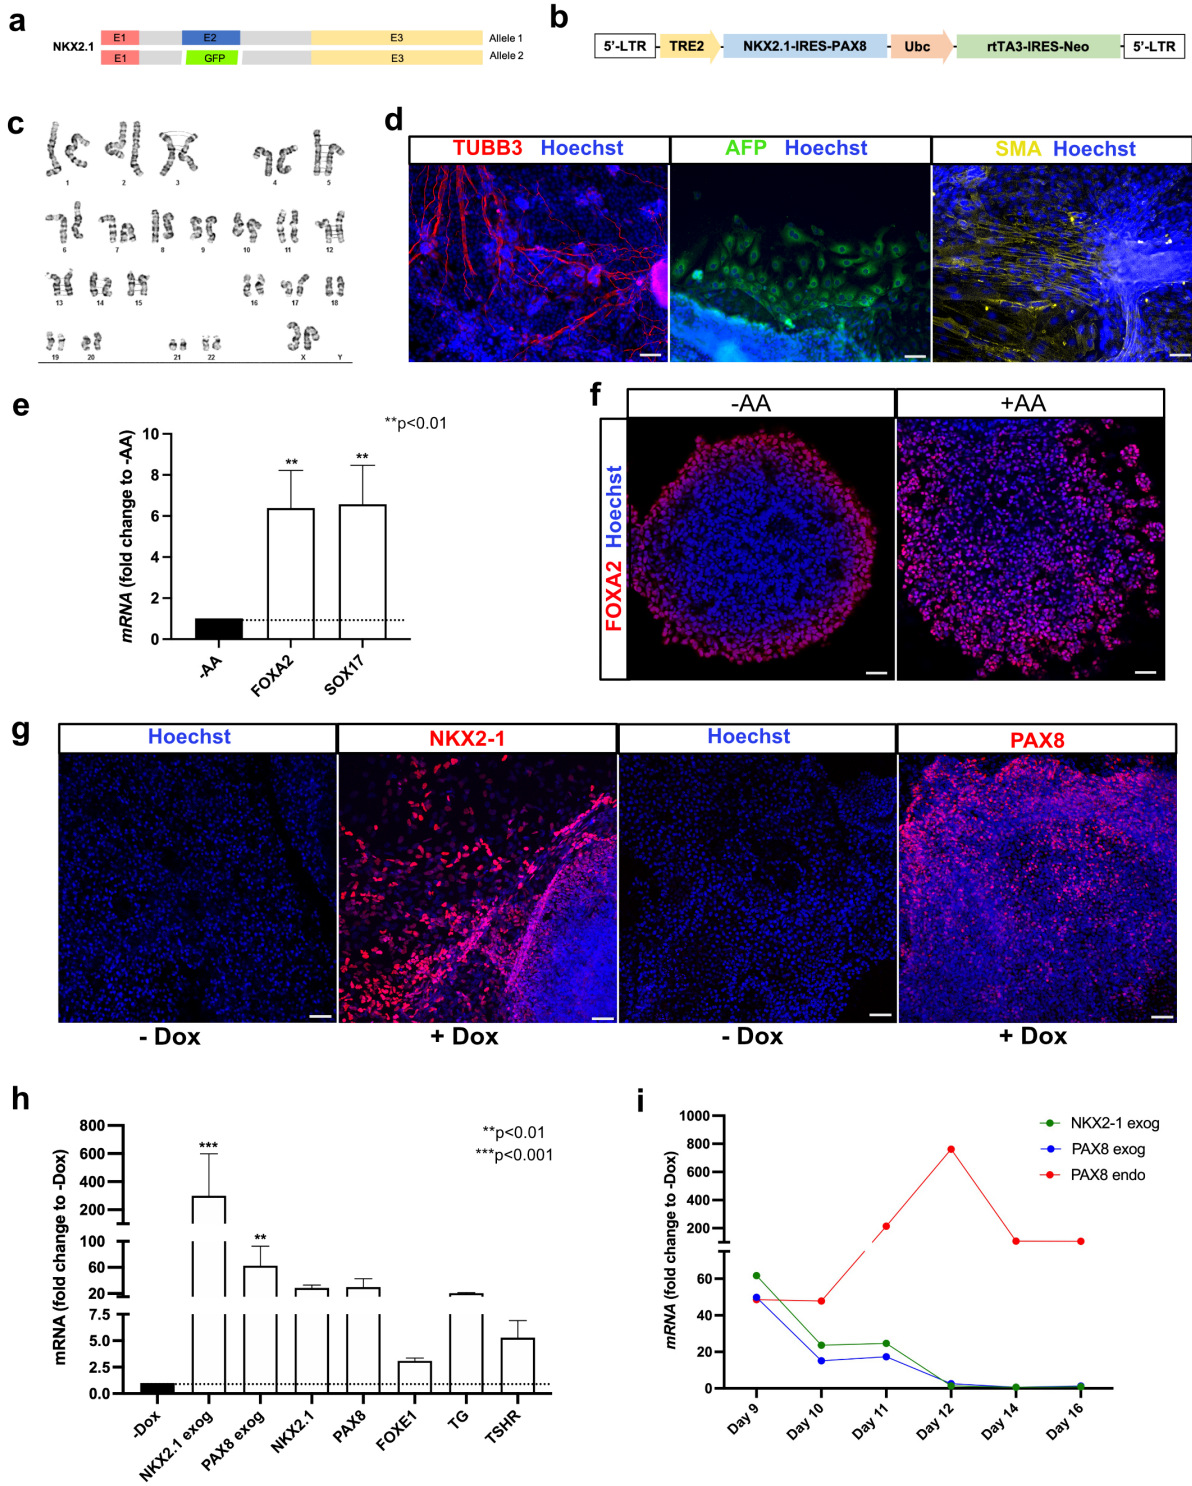

796

797 **Extended data Fig. 1. Generation, characterization and early differentiation of the**  
798 **NKX21-PAX8 tetracycline-inducible human ESC line.** (a) Schematic representation of the  
799 previously generated NKX2-1WT/GFP human ES cell line (Goulburn, 2011). (b) NKX21-  
800 PAX8 tetracycline-inducible human ESC line was generated by cloning OFRs into the  
801 pInducer20 lentivirus vector backbone. (c) Human ESCs showed normal karyotype after  
802 genetic manipulations. (d) Modified hESCs showed maintenance of pluripotency by  
803 spontaneous differentiation into ectoderm (TUBB3), endoderm (AFP) and mesoderm cells (a-  
804 SMA). I *FOXA2* and *SOX17* mRNA levels after activin A (AA) treatment (day 5). (f)  
805 Immunostaining shows increase in the percentage of FOXA2+ cells after treatment with AA  
806 and (g) induction of NKX2-1 and PAX8 after Dox treatment (day 9). qRT-PCR analysis for  
807 exogenous and endogenous *NKX2-1* and *PAX8*, *FOXE1*, *TG* and *TSHR* after Dox stimulation.  
808 (i) Gene expression curve of *TG* and exogenous *NKX2-1* and *PAX8* from day 9 to day 16 of the  
809 differentiation protocol. Unpaired t-test and Kruskal-Wallis test Multiple comparisons were  
810 used for statistical analysis. All analysis were performed using at least three independent  
811 experiments. \*\*p<0.01, \*\*\*p<0.001. Scale bars, 50  $\mu$ m.  
812

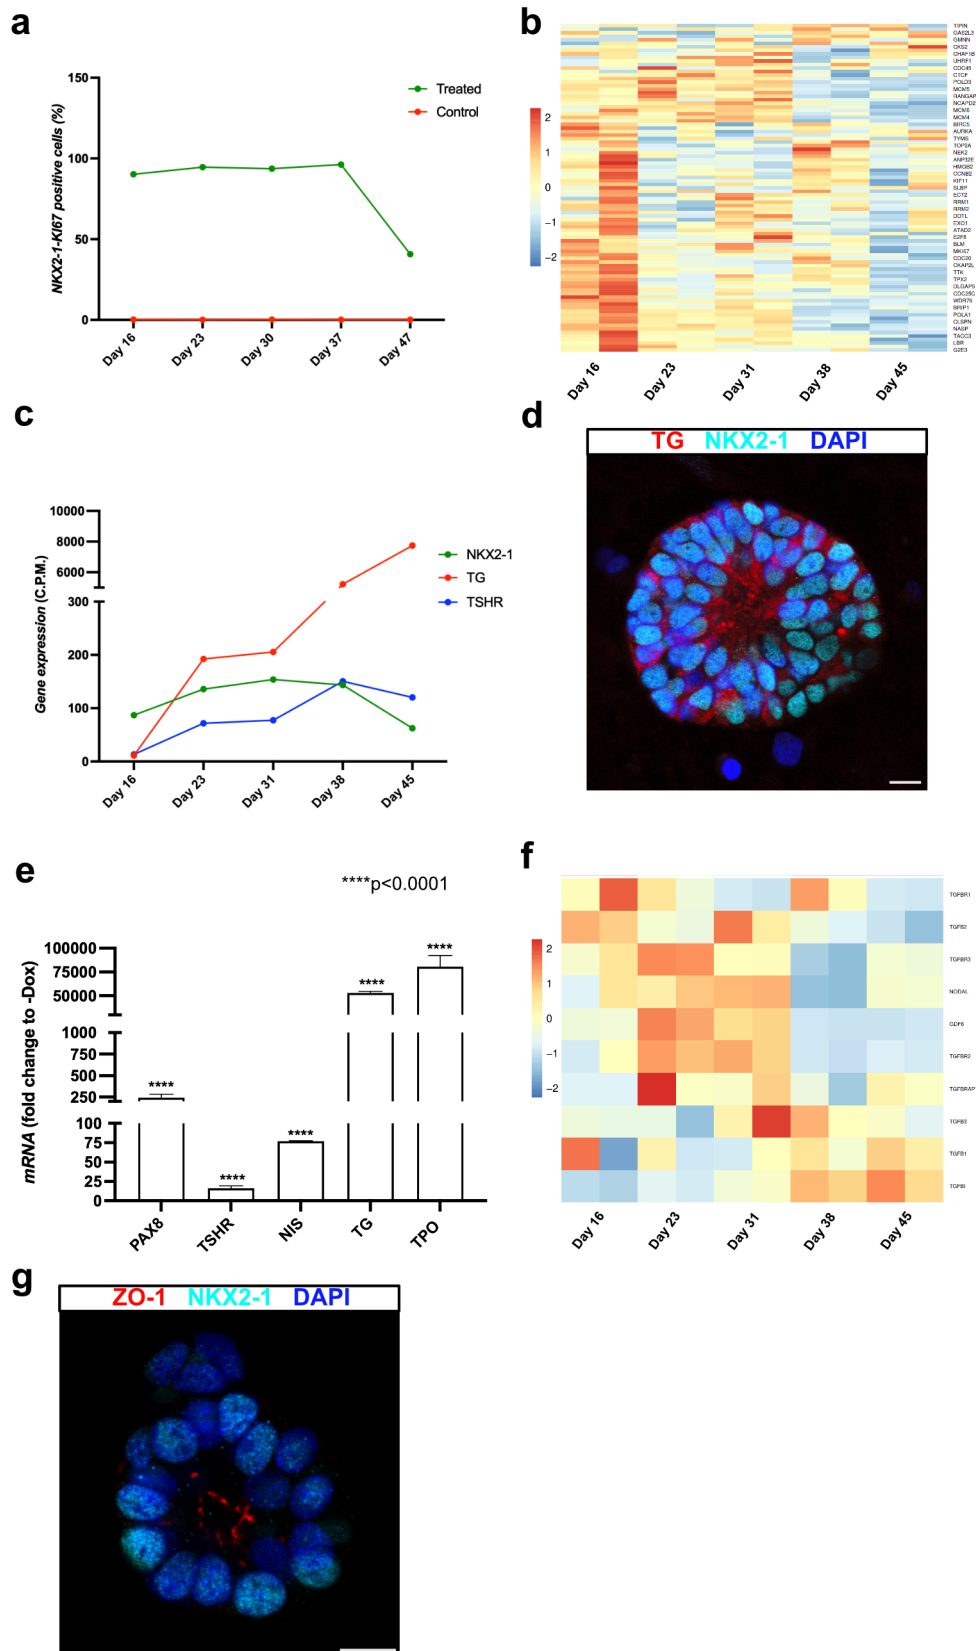

813

814 **Extended data Fig. 2. Characterization of the proliferation and early differentiation**

815 **stages of the human thyroid protocol. (a) Proportion of NKX2-1<sup>GFP+</sup> cells expressing the**

816 proliferation marker KI67 during the differentiation protocol. (b) Heatmap of bulk RNA-Seq  
817 expression of proliferation markers in NKX2-1<sup>GFP+</sup> cells at different stages of the  
818 differentiation protocol. Rows represent the marker and columns the specific time point. Color  
819 values represent mean expression levels. (c) *NKX2-1*, *TG* and *TSHR* gene expression curve  
820 (bulk RNA-Seq data) at different stages of the protocol. (d) NKX2-1 and TG co-staining, at  
821 day 28, showed progressive follicular organization, without the monolayer epithelium, but with  
822 the appearance of the luminal compartment. (e) qRT-PCR analysis of *PAX8*, *TSHR*, *NIS*  
823 */SLC5A5*, *TG* and *TPO* genes at day 45 compared to -Dox control. (f) Heatmap of bulk RNA-  
824 Seq expression of TGFβ signaling markers within NKX2-1<sup>GFP+</sup> cells by differentiation  
825 protocol. (g) NKX2-1 and ZO-1 co-staining, at day 45, shows the single-layered thyroid  
826 follicular epithelium and the delimited lumen formed. An unpaired t-test was used for statistical  
827 analysis and three independent samples were used for analysis. \*\*\*\*p<0.0001. Scale bars, 10  
828 μm.  
829



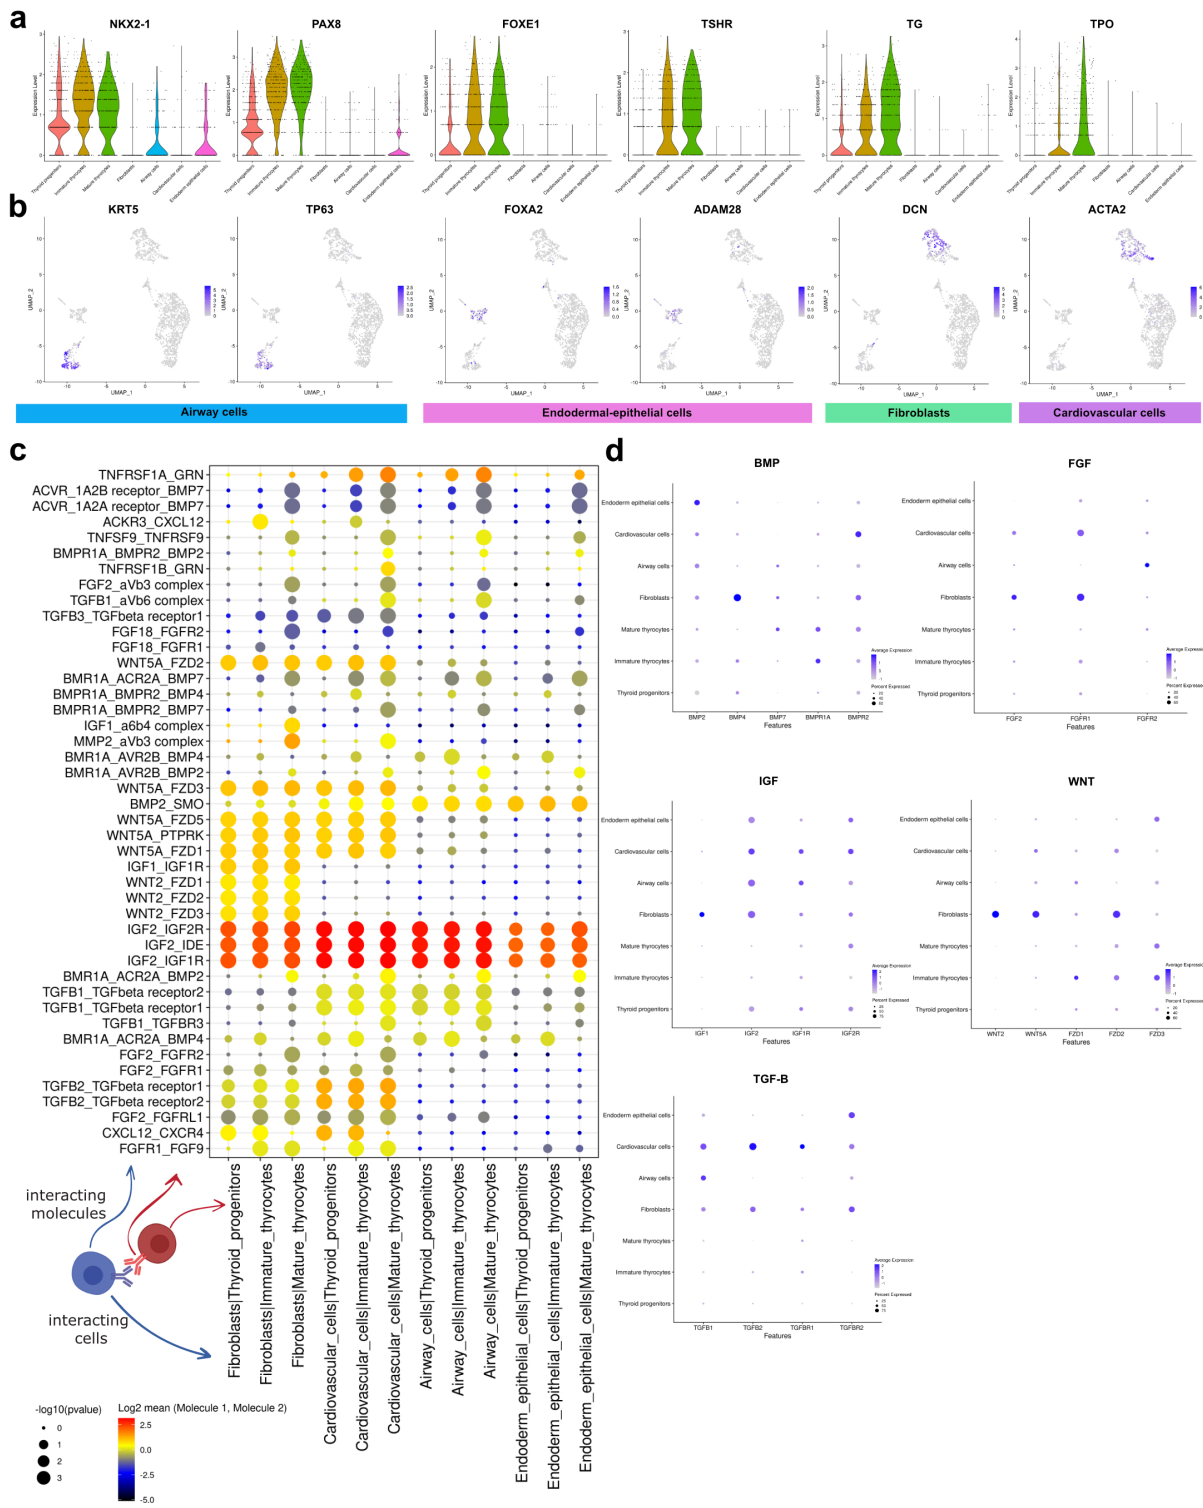

830

831 **Extended data Fig. 3. scRNA-Seq clusters characterization and CellPhone-DB**

832 **heterotypic interaction between thyroid populations and other cells. (a) Violin plots**

833 **showing expression levels of key thyroid markers between thyroid clusters and other cells. (b)**

834 **UMAP plots showing the expression of specific differentially expressed markers for non-**

835 thyroidal clusters. (c) Diagram showing selected ligand-receptor interactions using  
836 CellPhoneDB on the single-cell dataset of human thyroid organoids; P values are indicated by  
837 circle size. The color scale shows the Log<sub>2</sub> mean values of the average expression level of  
838 interacting molecule 1 from cluster 1 and interacting molecule 2 from cluster 2. (d) Dot plot  
839 visualization of markers expression from selected relevant interactions data across clusters.  
840 Shown are the expression levels of receptors and ligands for BMP, FGF, IGF, WNT and TGFβ  
841 pathways. The size of the circles indicates the percentage of expression. The color scale bar  
842 indicates the mean values of the average expression levels.  
843

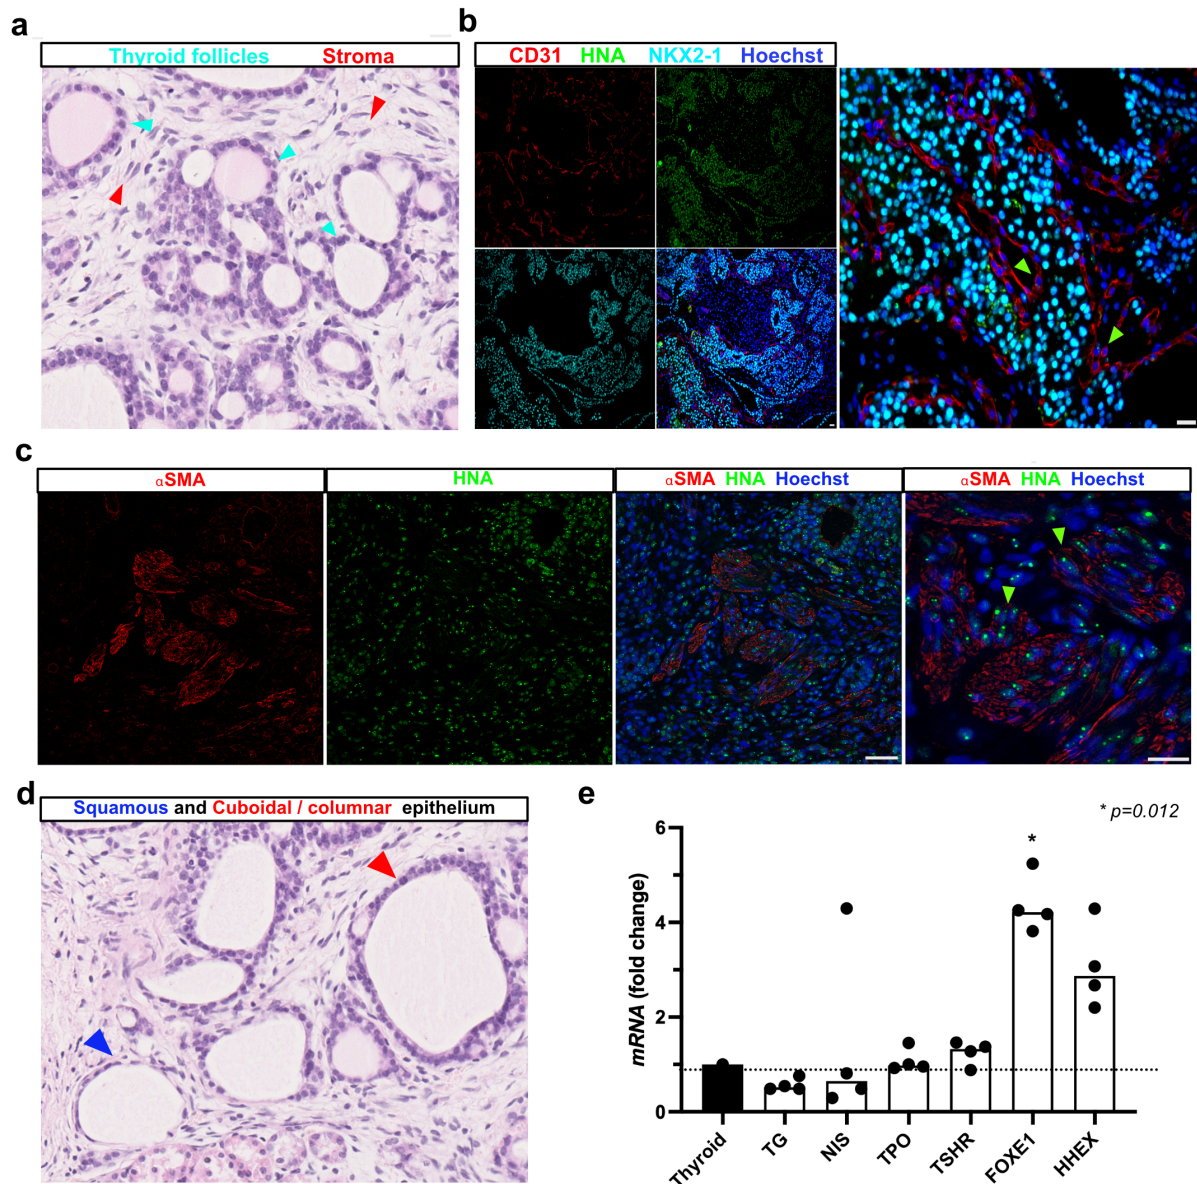

844

845 **Extended data Fig. 4. Histological characterization of transplanted human thyroid tissue.**

846 (a) H&E staining shows the presence of multiple thyroid follicles (green arrows) surrounded  
847 by stromal cells (red arrows). (b) NKX2-1 and CD31 immunostaining demonstrate the presence  
848 of a dense network of small blood vessels in close proximity to the thyroid follicles. CD31+  
849 cells do not express HNA (green arrows), providing clear evidence that the endothelial cells  
850 are host-derived. (c) Co-staining of a-SMA and HNA (green arrows) indicates a human origin  
851 of the stromal cells. (d) Histological analysis shows the presence of active follicles with  
852 cuboidal to weakly columnar epithelium (red arrows) and inactive follicles with flat/scaly cell

853 organization (blue arrows). (e) Gene expression levels of thyroid markers in transplanted tissue

854 (n=4) compared to human thyroid tissue. An unpaired t-test was used for statistical analysis.

855 \*p<0.012. Scale bars, 20  $\mu$ m.

856

## 857 **Tables**

858

### 859 **Extended table 1: Human differentiation medium composition**

860

| <b>hESC Differentiation Medium</b>       | <b>Stock concentration</b> | <b>Final concentration</b> | <b>Volume (50 ml)</b> |
|------------------------------------------|----------------------------|----------------------------|-----------------------|
| DMEM/F12 + Glutamax                      |                            |                            | 38.4 ml               |
| FBS                                      |                            | 20% v/v                    | 10 ml                 |
| MEM-Non-Essential Amino Acids (MEM-NEAA) | 100x                       | 1%                         | 500 $\mu$ l           |
| Sodium pyruvate                          | 100x                       | 1%                         | 500 $\mu$ l           |
| P/S                                      | 100x                       | 1%                         | 500 $\mu$ l           |
| 2-Mercaptoethanol (in PBS)               | 7%                         | 0.007%                     | 50 $\mu$ l            |
| Vitamin C                                | 50 mg/ml                   |                            | 50 $\mu$ l            |

861

### 862 **Extended table 2: List of primary and secondary antibodies used in the experiments.**

| <b>Primary antibodies</b>    |                        |                              |                            |                                  |                           |
|------------------------------|------------------------|------------------------------|----------------------------|----------------------------------|---------------------------|
| <b><i>Protein Target</i></b> | <b><i>Provider</i></b> | <b><i>Catalog number</i></b> | <b><i>Host Species</i></b> | <b><i>Dilution Flow Cyt.</i></b> | <b><i>Dilution IF</i></b> |
| AFP                          | Santa Cruz             | sc-8108                      | Goat                       |                                  | 1:100                     |
| $\beta$ -III Tubulin         | Eurogentec             | MMS-435P-200                 | Mouse                      |                                  | 1:1,000                   |
| $\alpha$ SMA                 | Abcam                  | ab32575                      | Rabbit                     |                                  | 1:1,000                   |
| NKX2-1                       | Abcam                  | ab76013                      | Rabbit                     |                                  | 1:500                     |
| PAX8                         | Cell Signaling         | 59019                        | Rabbit                     |                                  | 1:500                     |
| TG                           | Dako                   | A0251                        | Rabbit                     |                                  | 1:2,000                   |
| TG                           | Abcam                  | Ab187378                     | Mouse                      |                                  | 1:250                     |

|                             |                           |             |                        |       |         |
|-----------------------------|---------------------------|-------------|------------------------|-------|---------|
| TPO                         | Santa Cruz                | sc-58432    | Mouse                  |       | 1:100   |
| T4                          | Biorbyt                   | orb11479    | Goat                   |       | 1:1,000 |
| T4                          | Invitrogen                | MA5-14716   | Mouse                  |       | 1:100   |
| E-cadherin                  | BD                        | 610181      | Mouse                  |       | 1:1,000 |
| CD31                        | R&D                       | AF3628      | Goat                   |       | 1:100   |
| HNA                         | Abcam                     | ab190710    | Mouse                  |       | 1:250   |
| KI67                        | Abcam                     | ab15580     | Rabbit                 | 1:100 |         |
| <b>Secondary antibodies</b> |                           |             |                        |       |         |
| Cy3-conjugated              | Jackson<br>ImmunoResearch | 715-165-150 | Donkey anti-mouse IgG  |       | 1:500   |
| Cy3-conjugated              | Jackson<br>ImmunoResearch | 711-165-152 | Donkey anti-rabbit IgG |       | 1:500   |
| Cy3-conjugated              | Jackson<br>ImmunoResearch | 705-165-147 | Donkey anti-goat IgG   |       | 1:500   |
| Alexa fluor 488-conjugated  | Jackson<br>ImmunoResearch | 715-545-150 | Donkey anti-mouse IgG  |       | 1:500   |
| Alexa fluor 647-conjugated  | Jackson<br>ImmunoResearch | 715-605-150 | Donkey anti-mouse IgG  |       | 1:500   |
| Alexa fluor 647-conjugated  | Jackson<br>ImmunoResearch | 711-605-152 | Donkey anti-rabbit IgG | 1:300 | 1:500   |

863

864 **Extended table 3:** List of primers sequences used for qRT-PCR analysis.

| Gene name | Primer Forward         | Primer Reverse          |
|-----------|------------------------|-------------------------|
| FOXA2     | GGGAGCGGTGAAGATGGA     | TCATGTTGCTCACGGAGGAGTA  |
| SOX17     | GTGGACCGCACGGAATTG     | CACGTCAGGATAGTTGCAGTAAT |
| exNXK2-1  | TGTCCTGCTCCACCTTGCT    | CGCACACCGGCCTTATTCCA    |
| exPAX8    | CCTCGGTGCACATGCTTTAC   | GAGGTCTGCCATTACAAAAGG   |
| NKX2-1    | GCTTCCCCGCCATCTCC      | GCCATGTTCTTGCTCAGCTC    |
| PAX8      | CGAGCGACTCCCCGGCGAT    | GAGGTCTGCCATTACAAA      |
| FOXE1     | GCGACAACCCCAAAAAGTGG   | GCCAGTAGCCCTTACC        |
| HHEX      | GGACGGTGAACGACTACACGCA | CCAGACGCTTCCTCTCGGCGC   |
| TG        | AGACACCTCCTACCTCCCTCA  | TCCTTGACATCGCTTTGGC     |
| TSHR      | TGACCTTTCTACCCAAGCCA   | TGCTCTCAAGGACTTACACATCA |

|            |                       |                        |
|------------|-----------------------|------------------------|
| TPO        | CTGTCACGCTGGTTATGGC   | GCTAGAGACACGAGACTCCTCA |
| NIS/SLC5A5 | ATCGCTATGGCCTCAAGTTCC | TCCAGGTACTCGTAGGTGCT   |
| GAPDH      | CTATAAATTGAGCCCGCAGCC | TACGACCAAATCCGTTGACTC  |
